# Supplementary material for: Rotenone Induces a Neuropathological Phenotype in Cholinergic-like Neurons Resembling Parkinson’s Disease Dementia (PDD)
Source: PubMed Central journal article supplement (PMC11156752; doi:10.1007/s12640-024-00705-3), 2024-06-06
Supplement: 12640_2024_705_MOESM1_ESM.pdf [file 12640_2024_705_MOESM1_ESM.pdf]

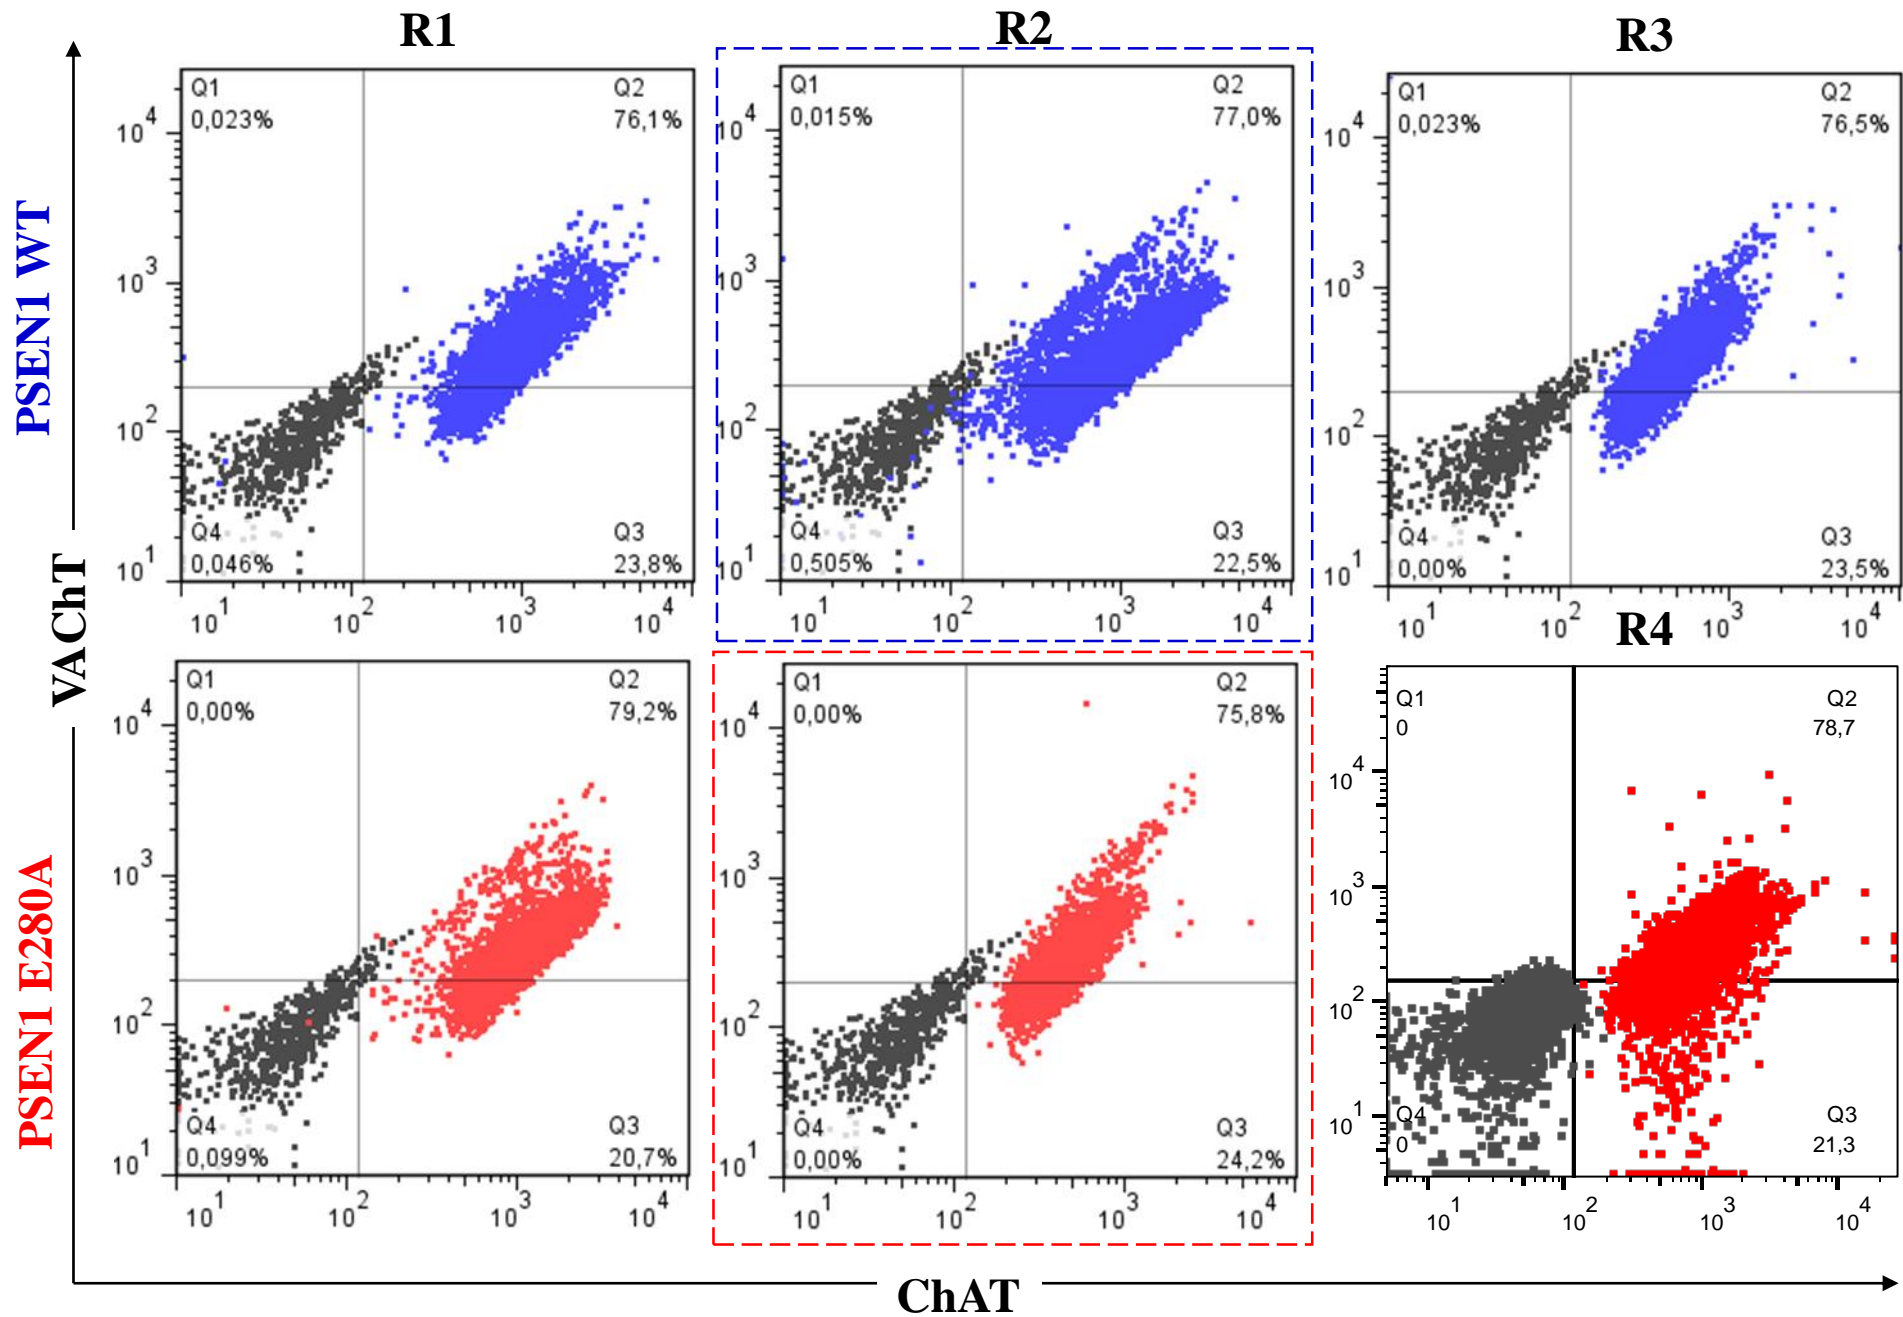

Unstained Cells  
**WT ChLNs**  
**E280A ChLNs**

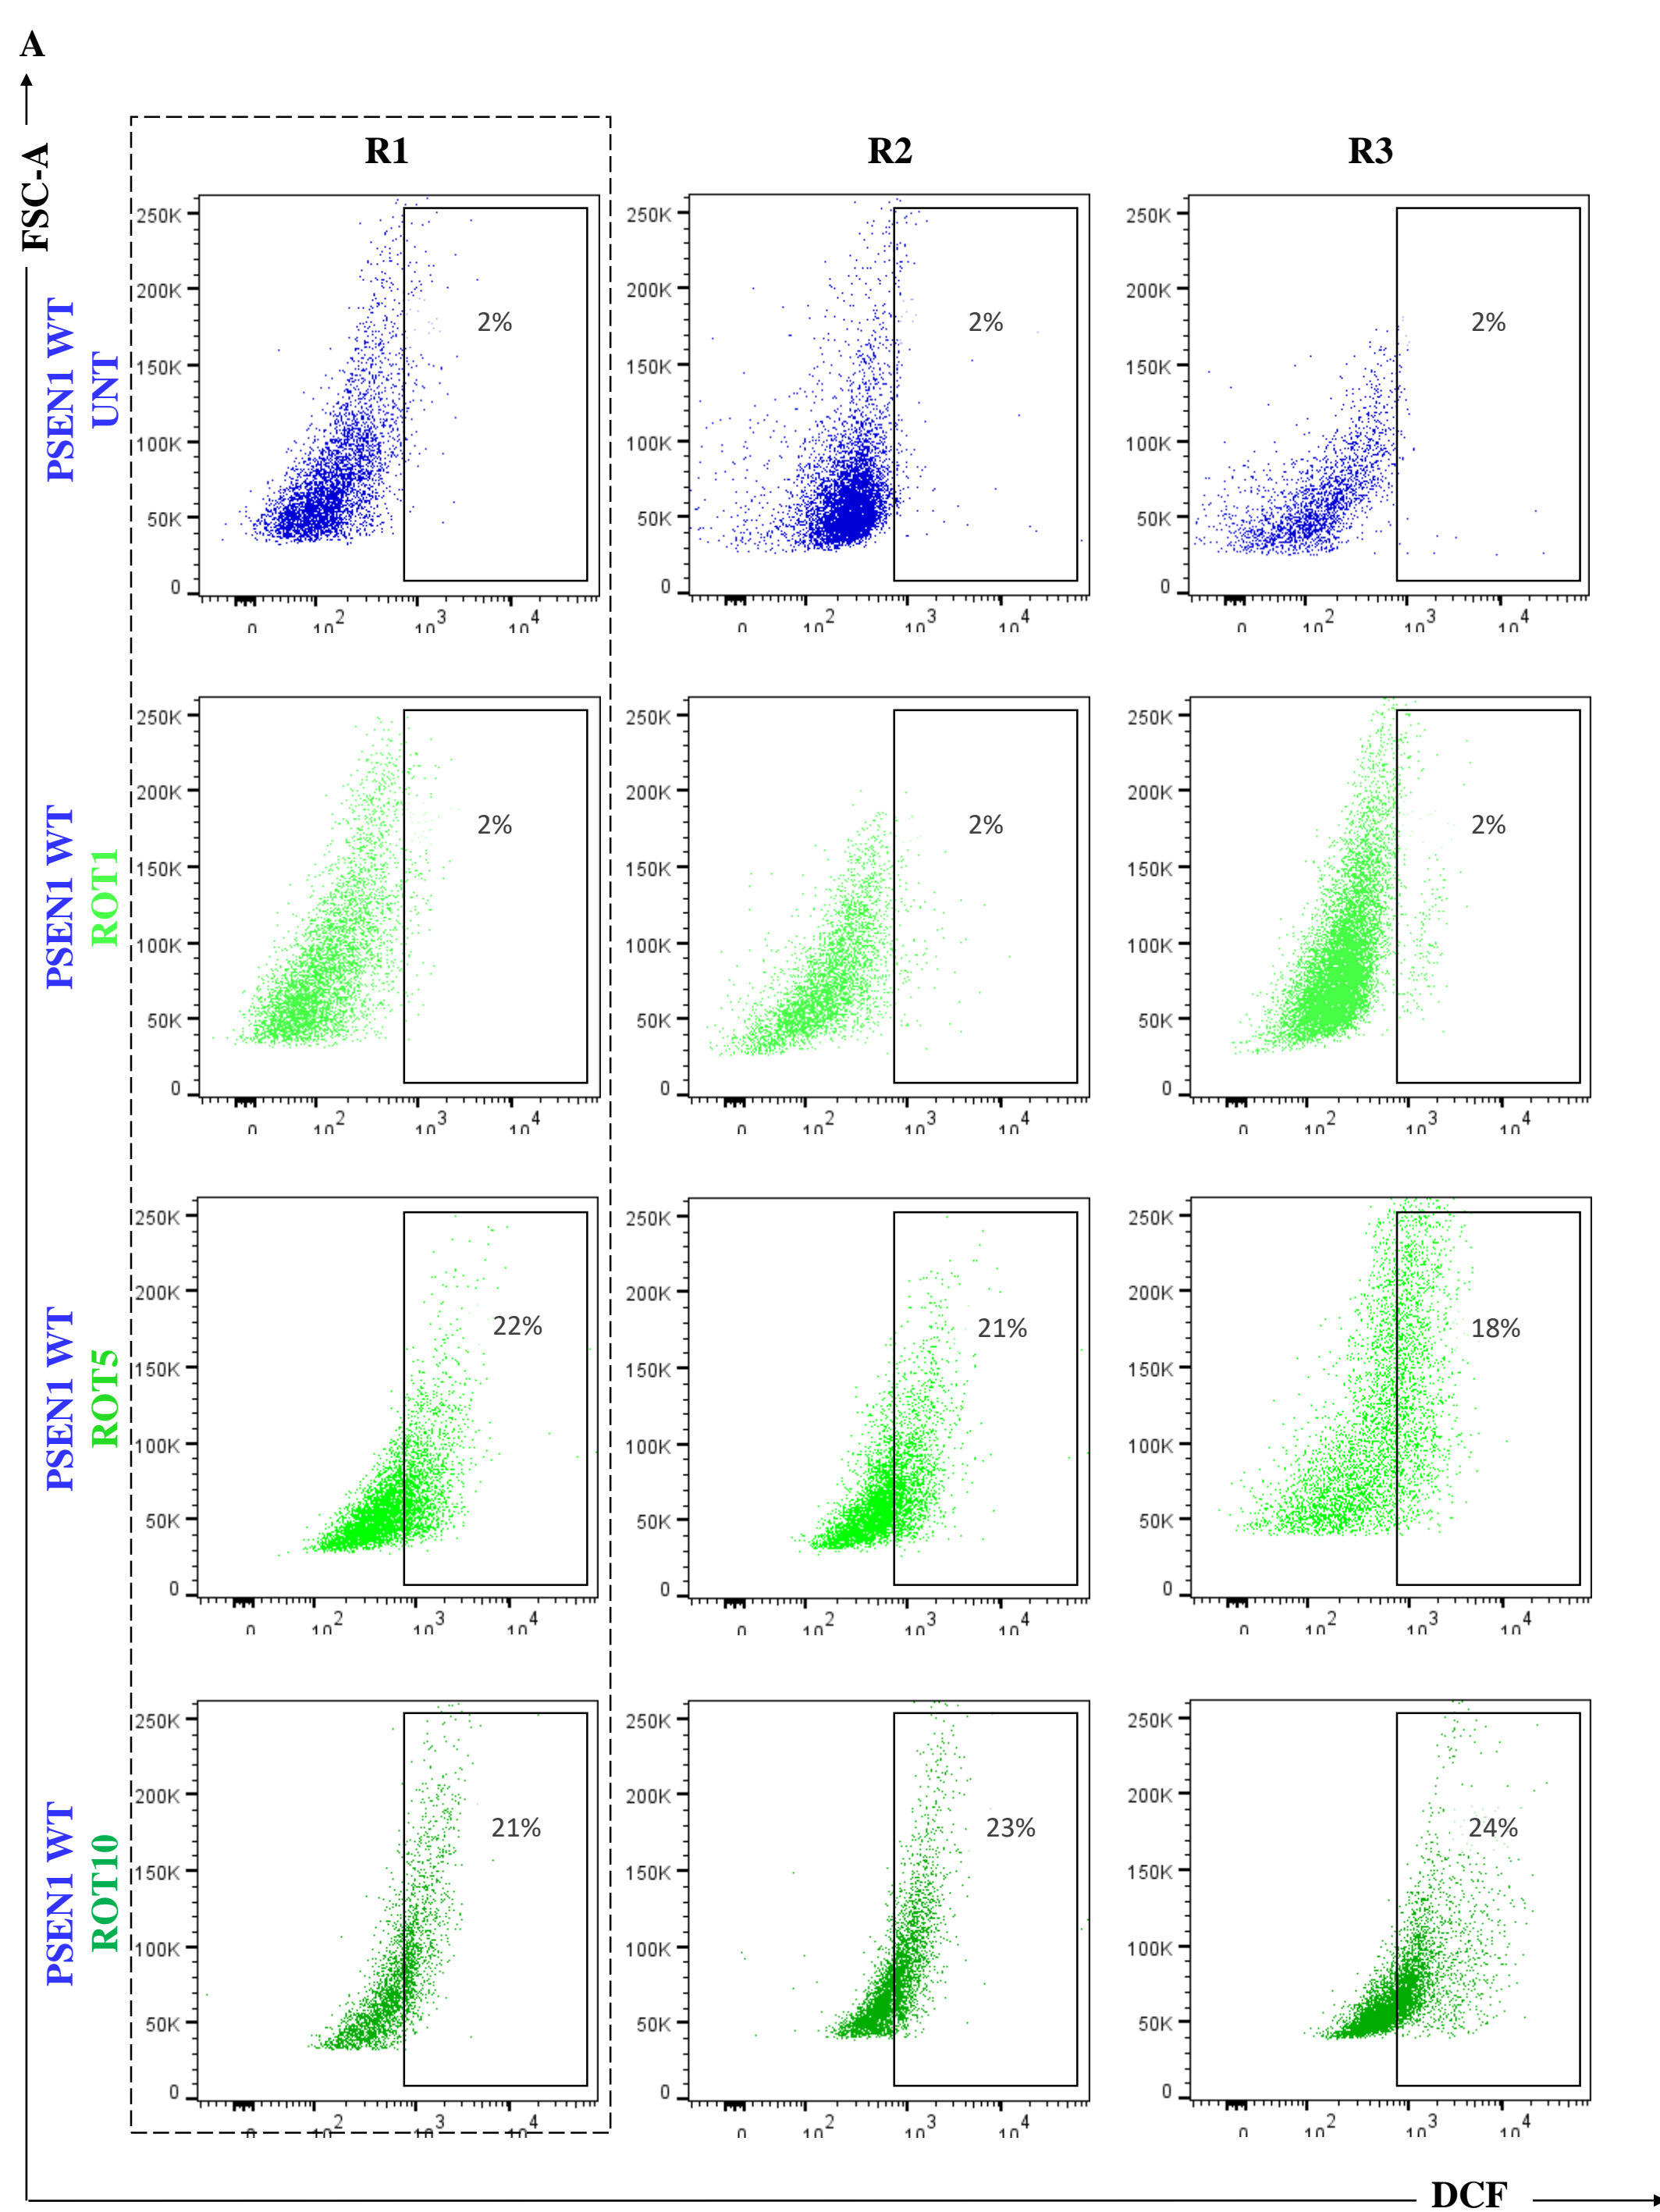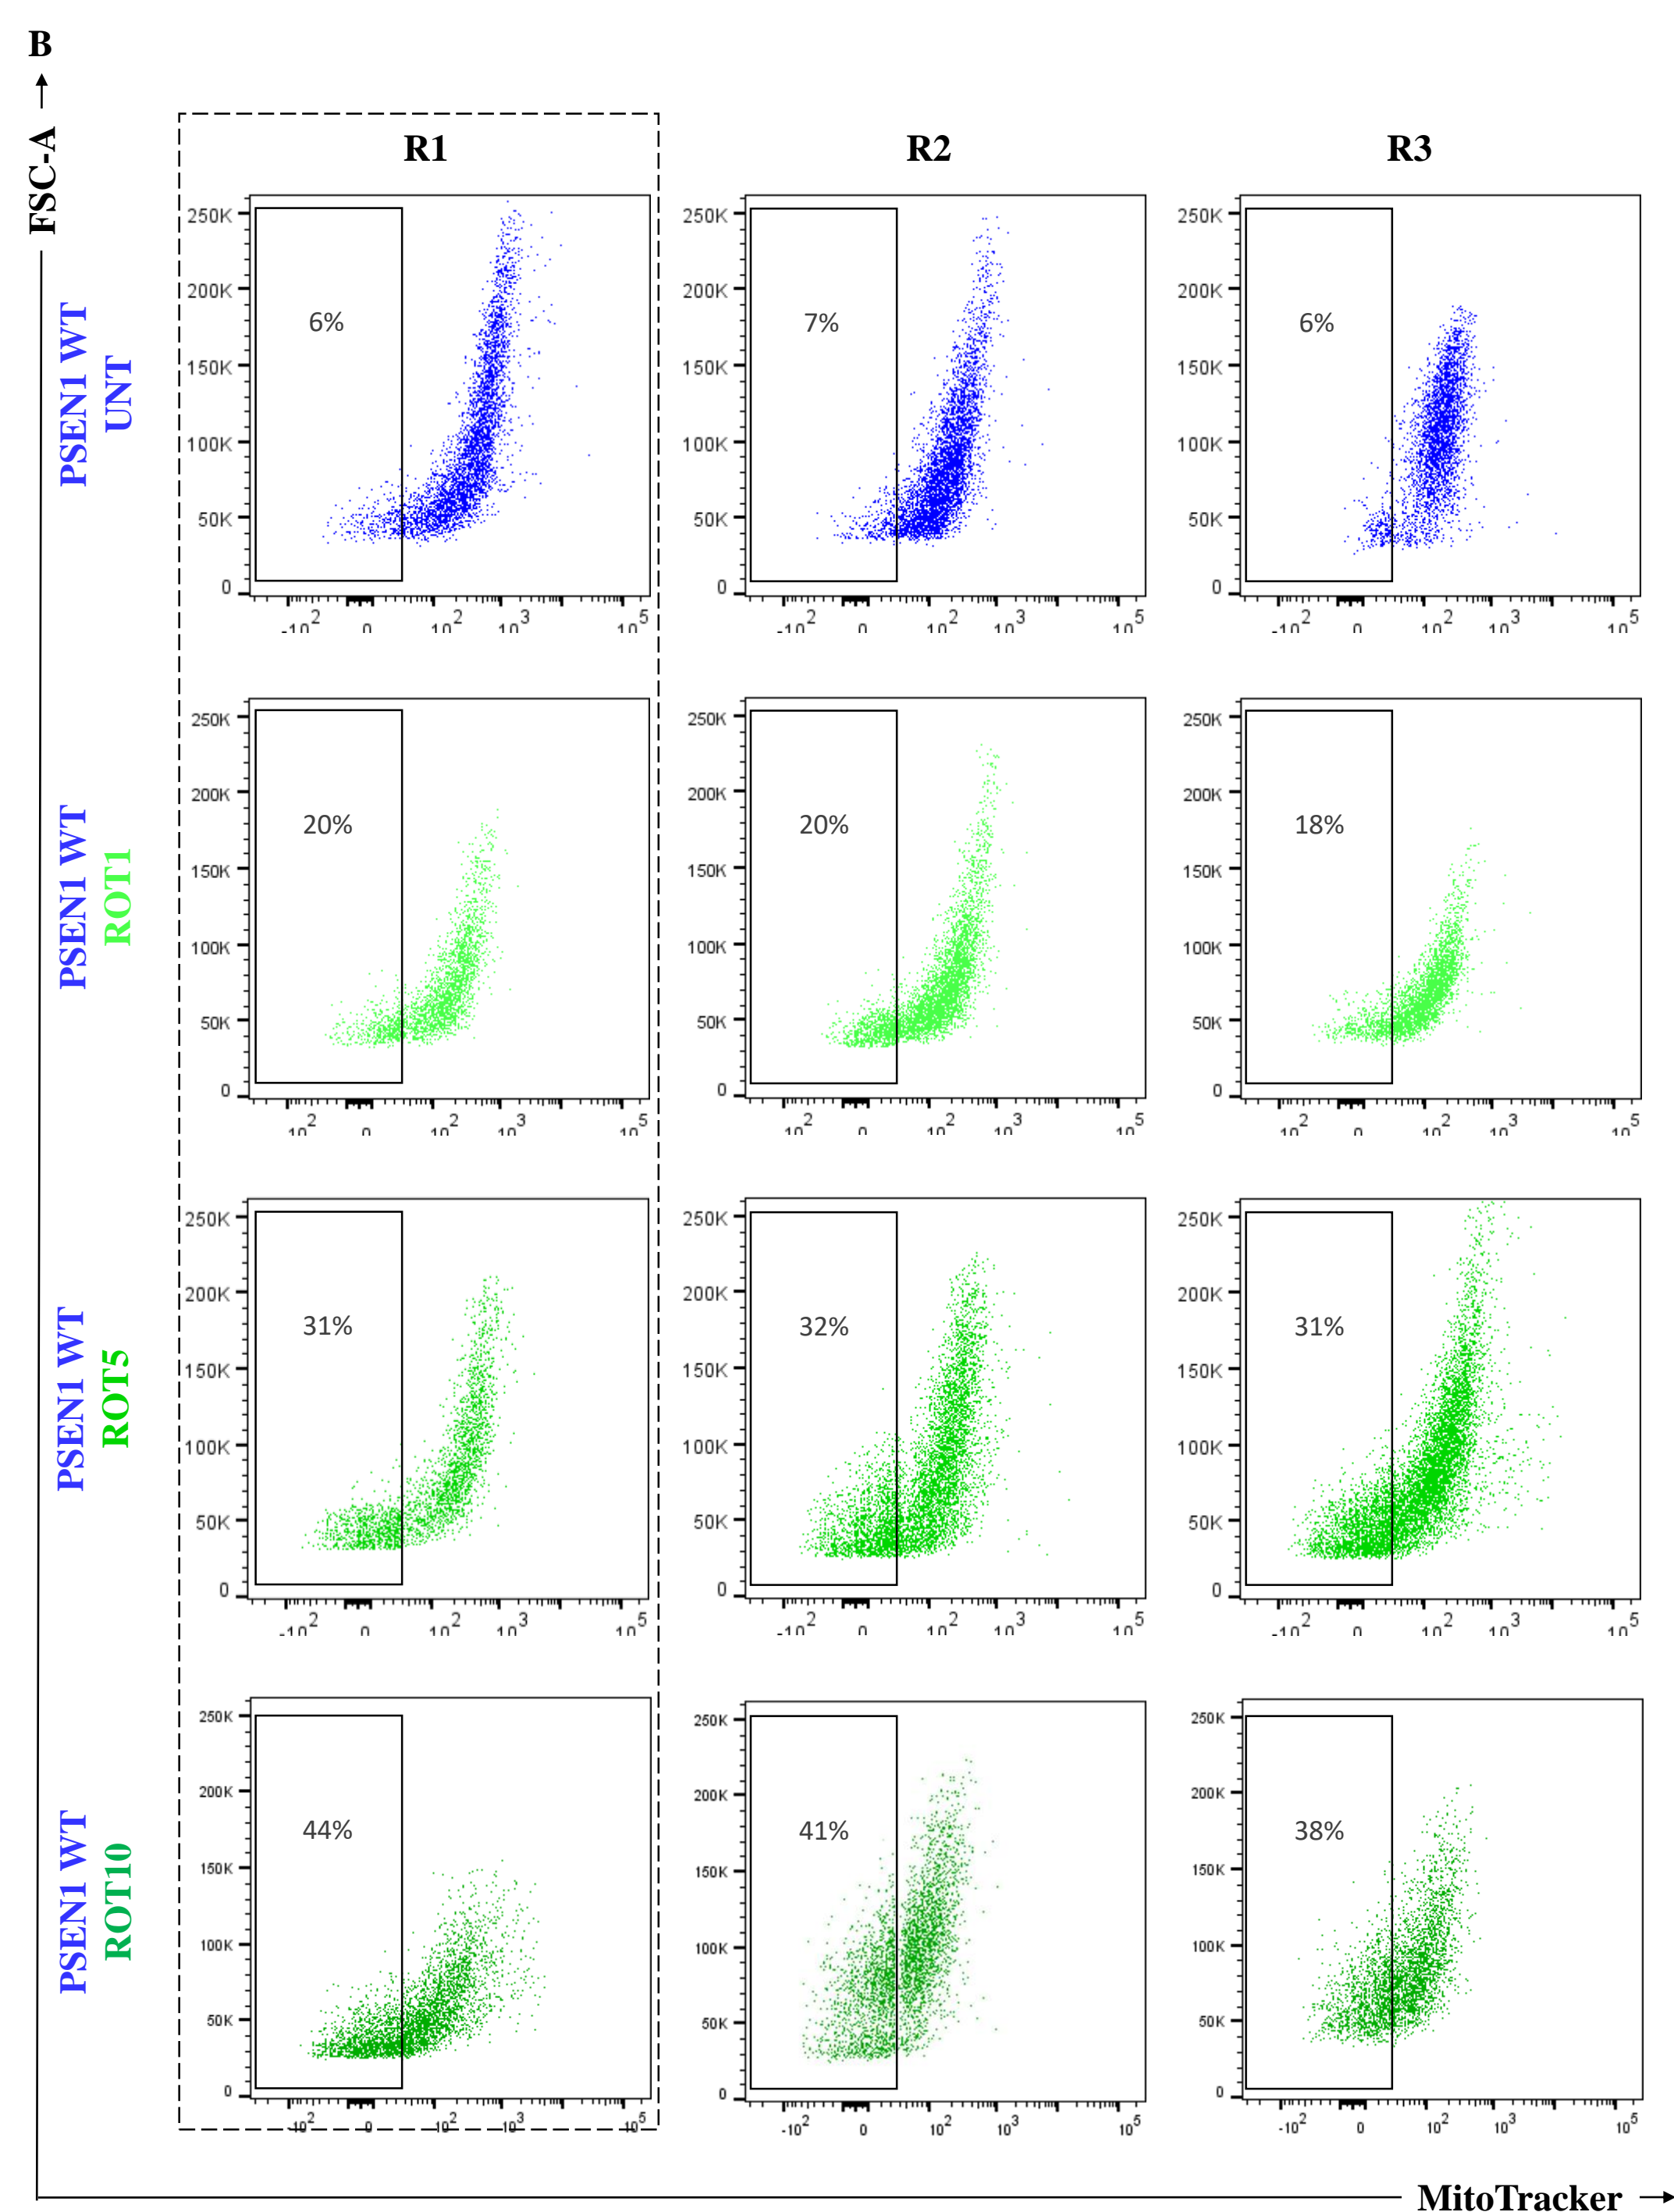

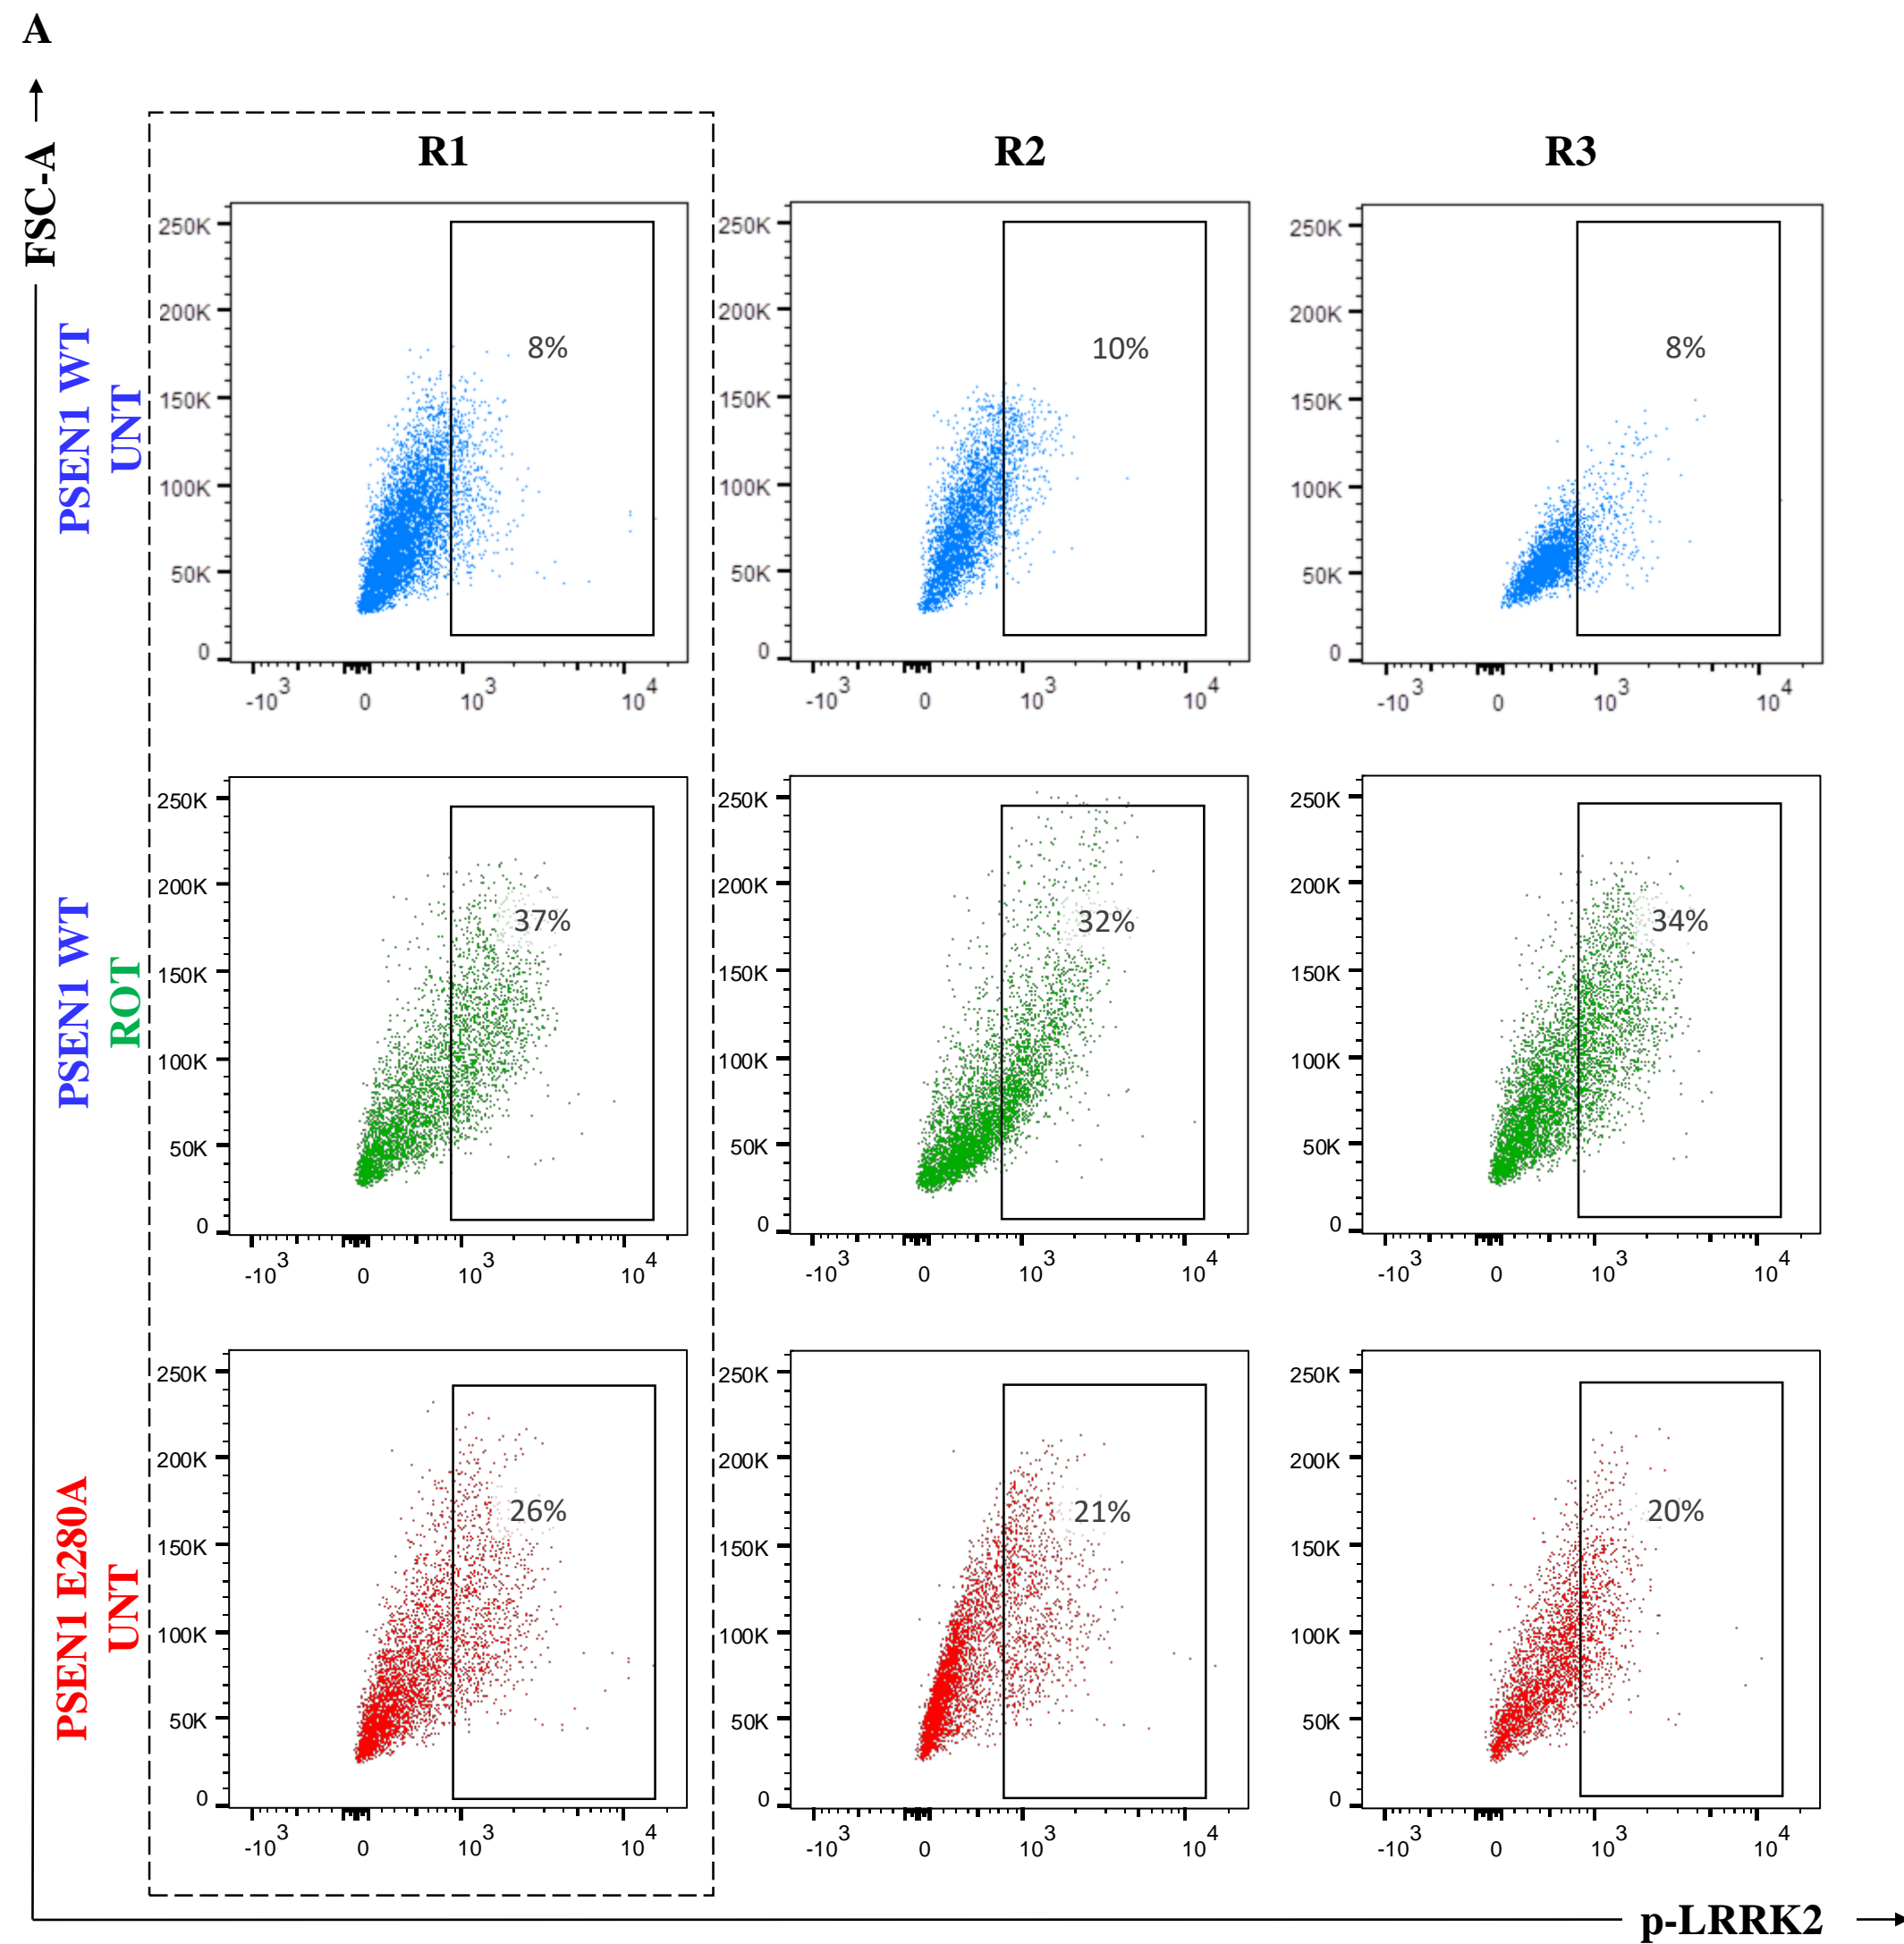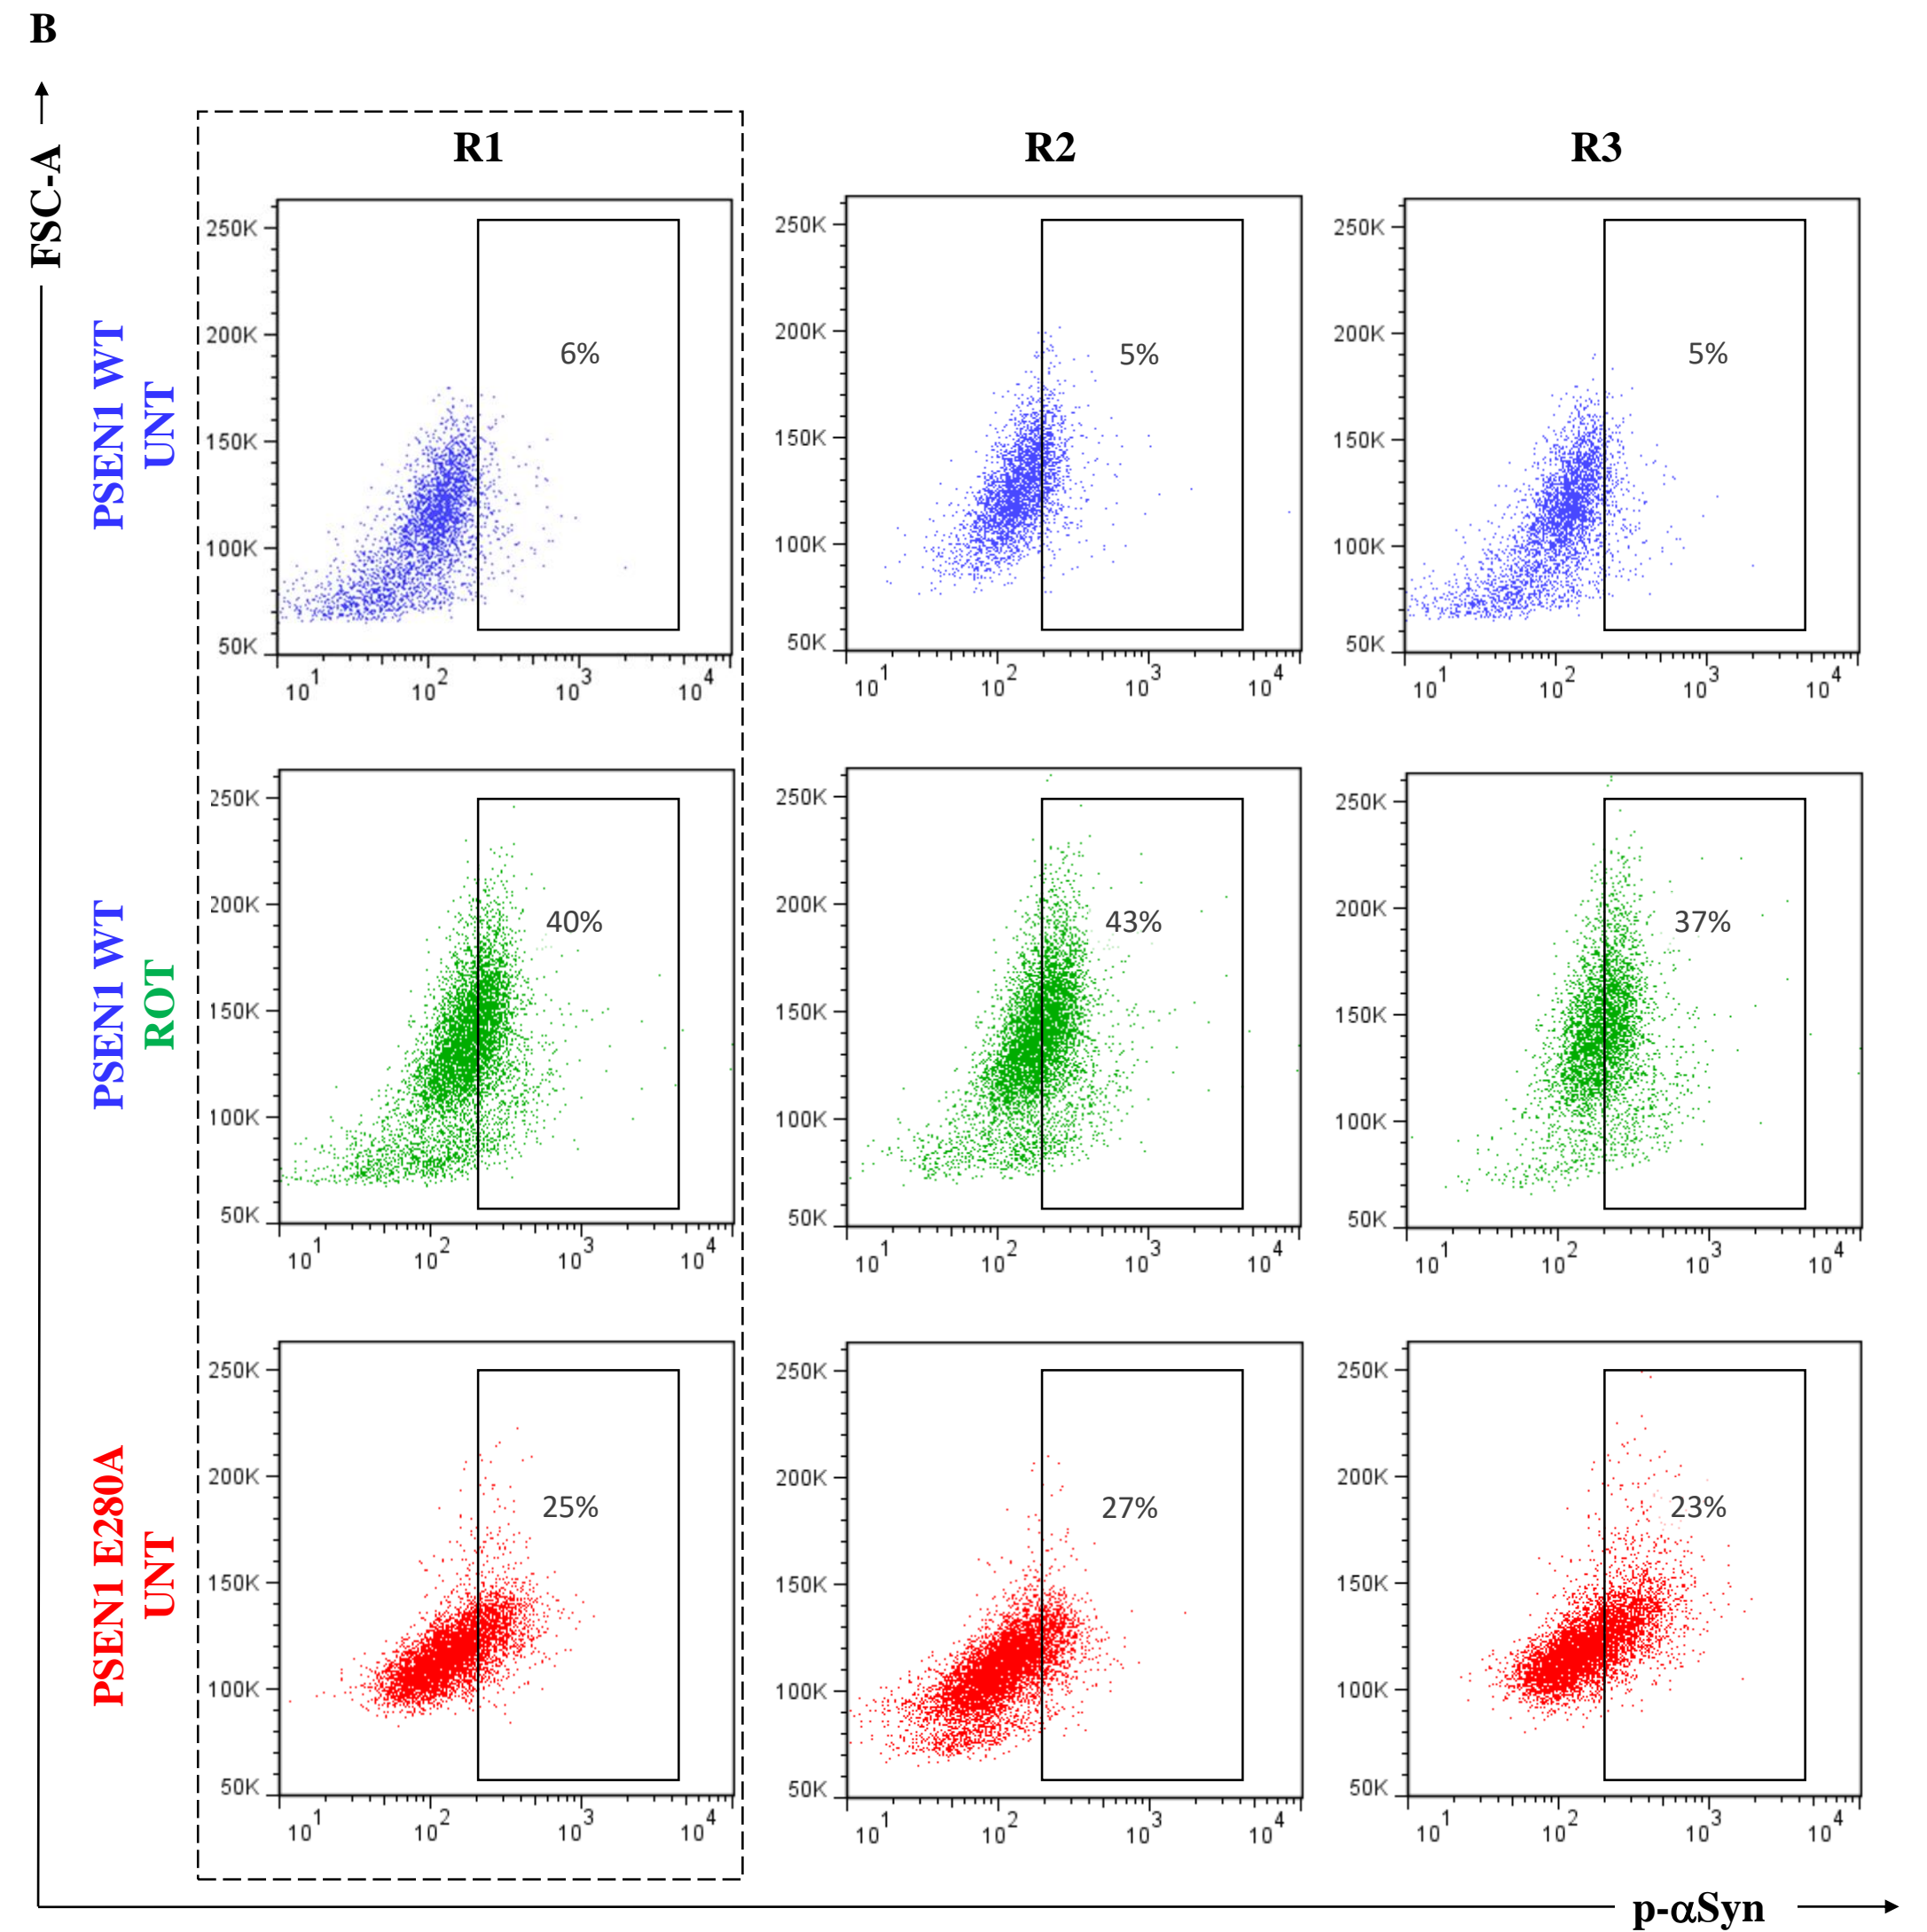

Supplementary Figure 3

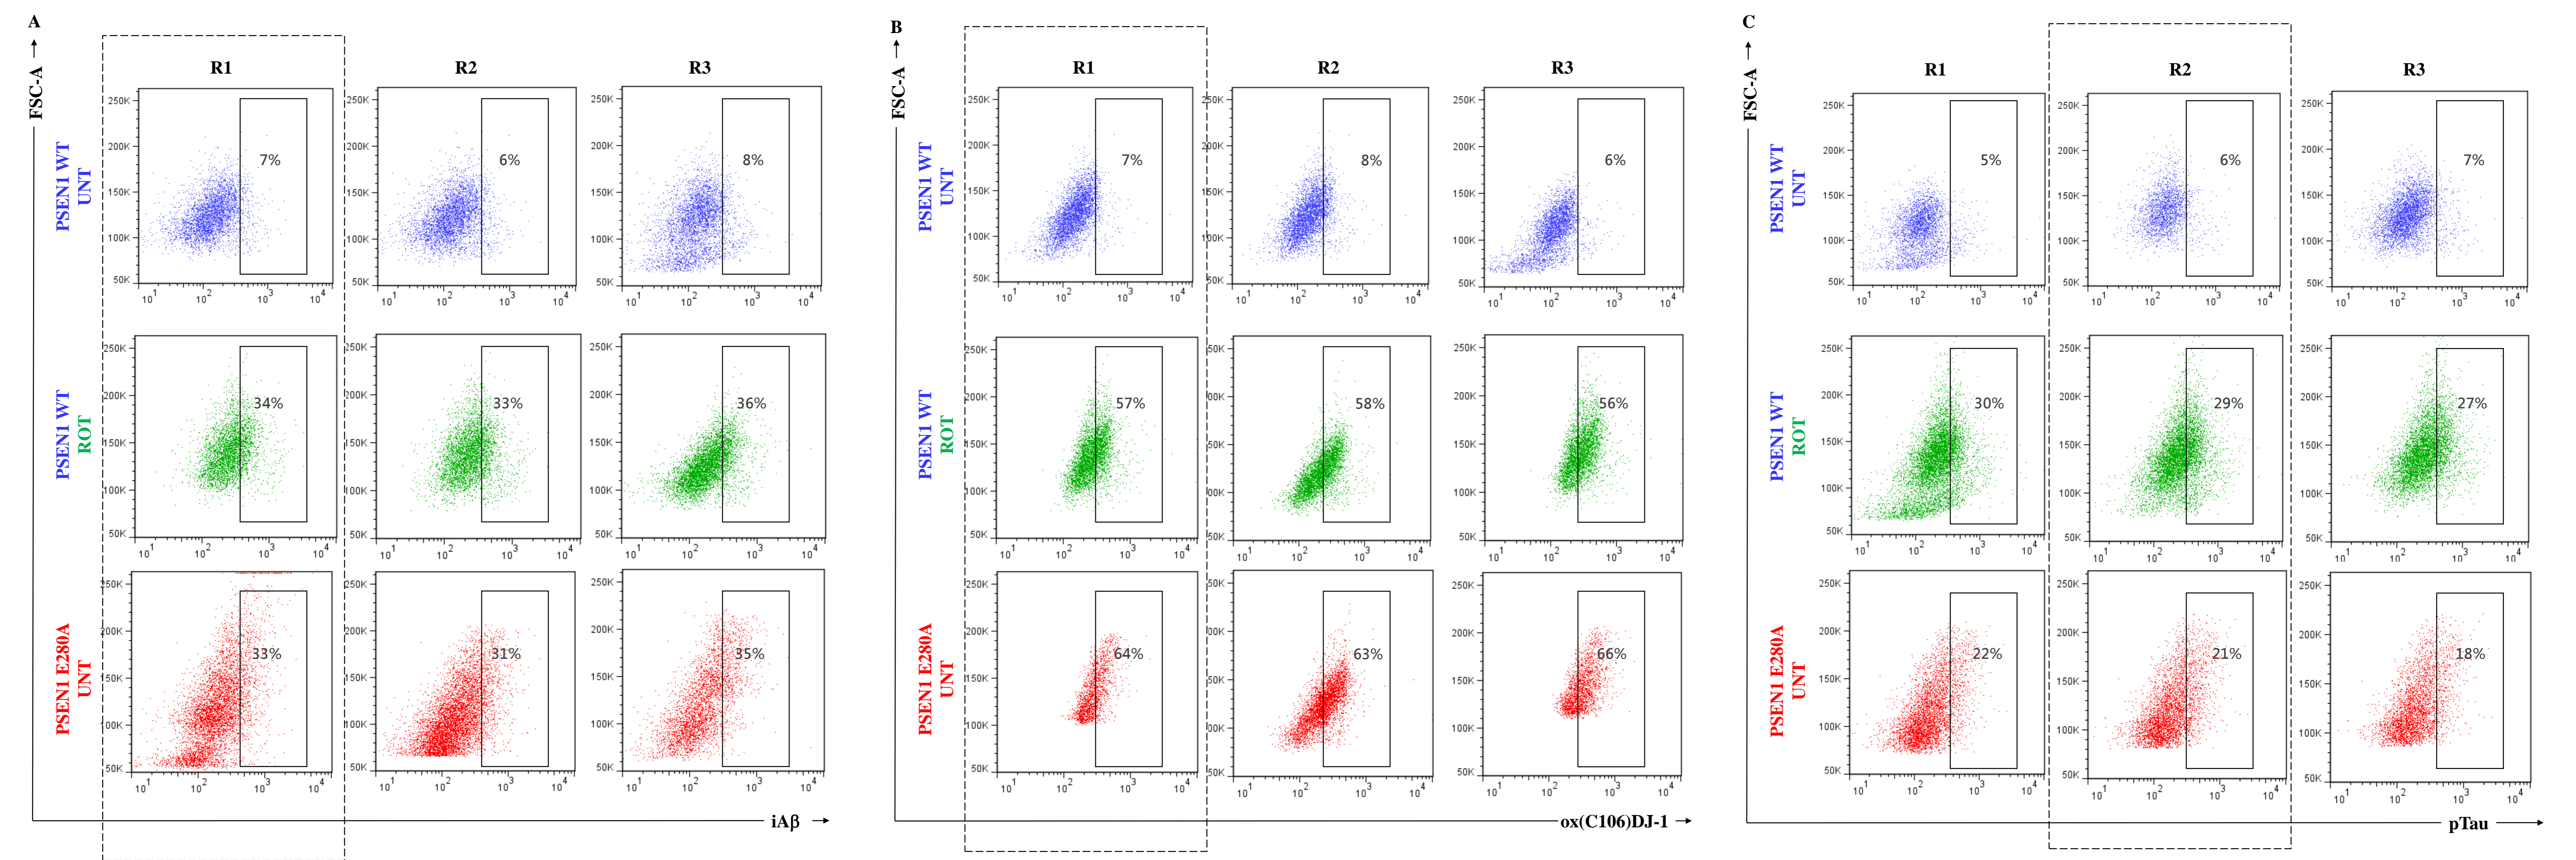

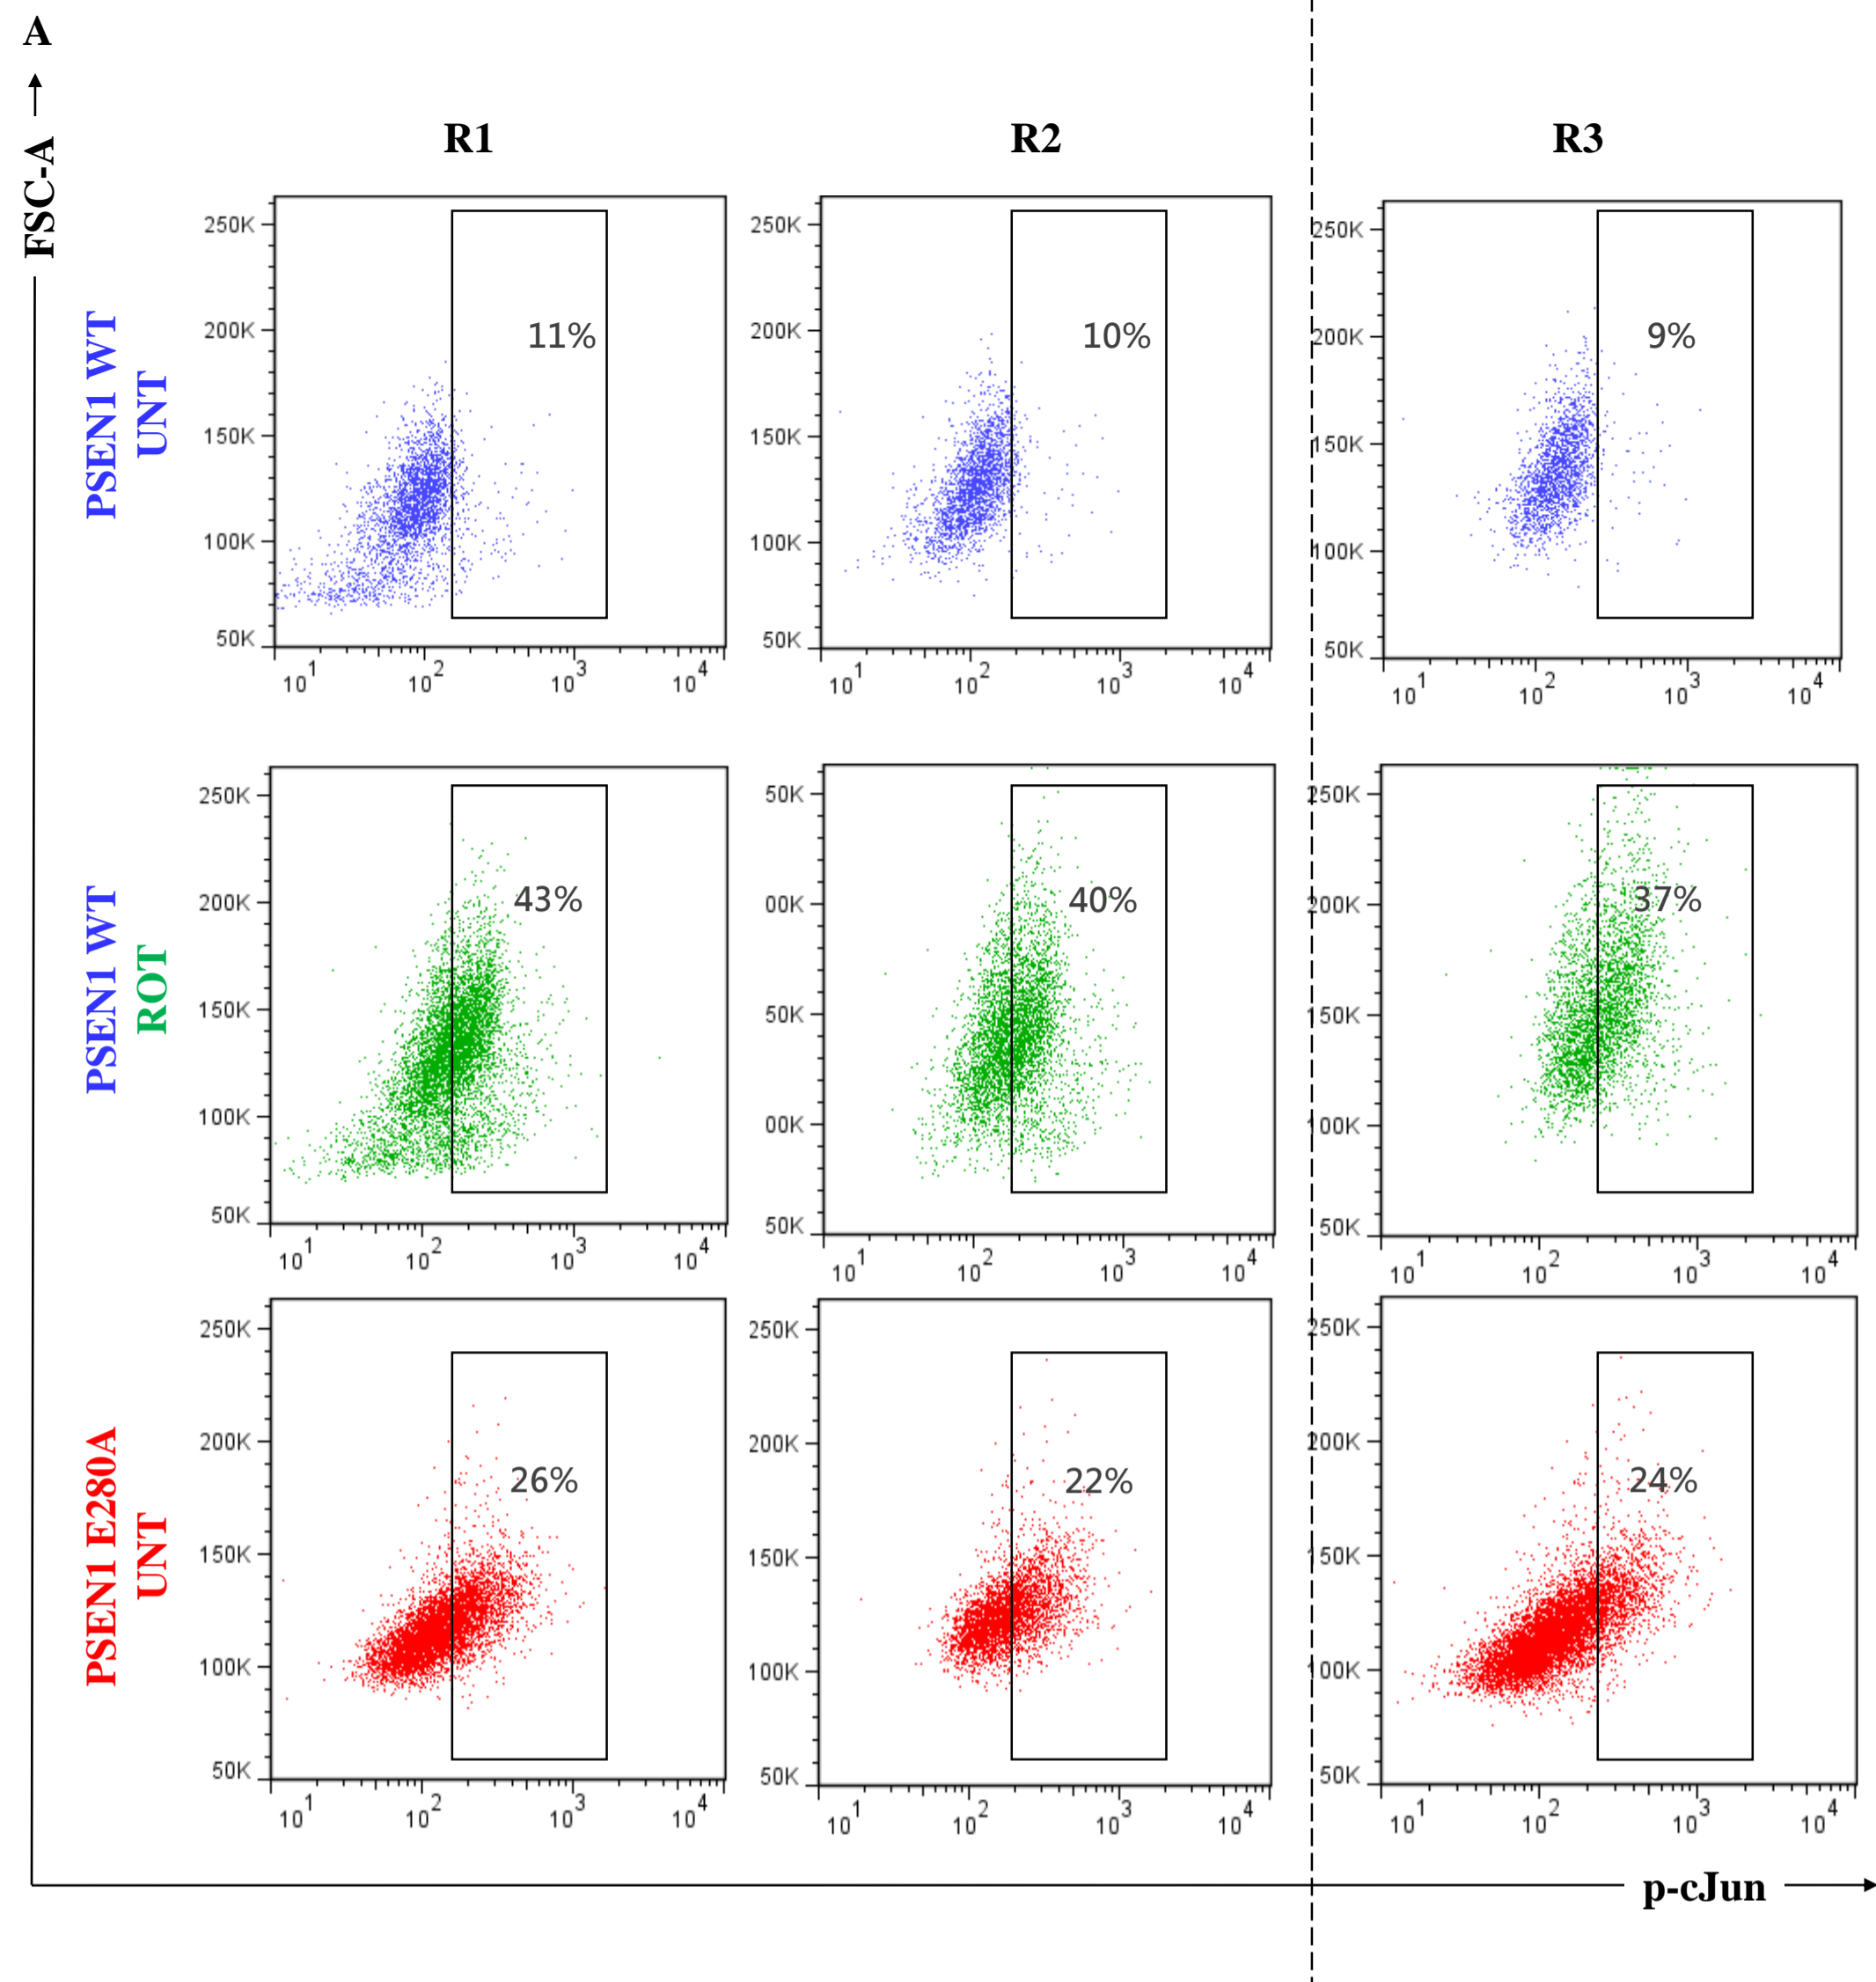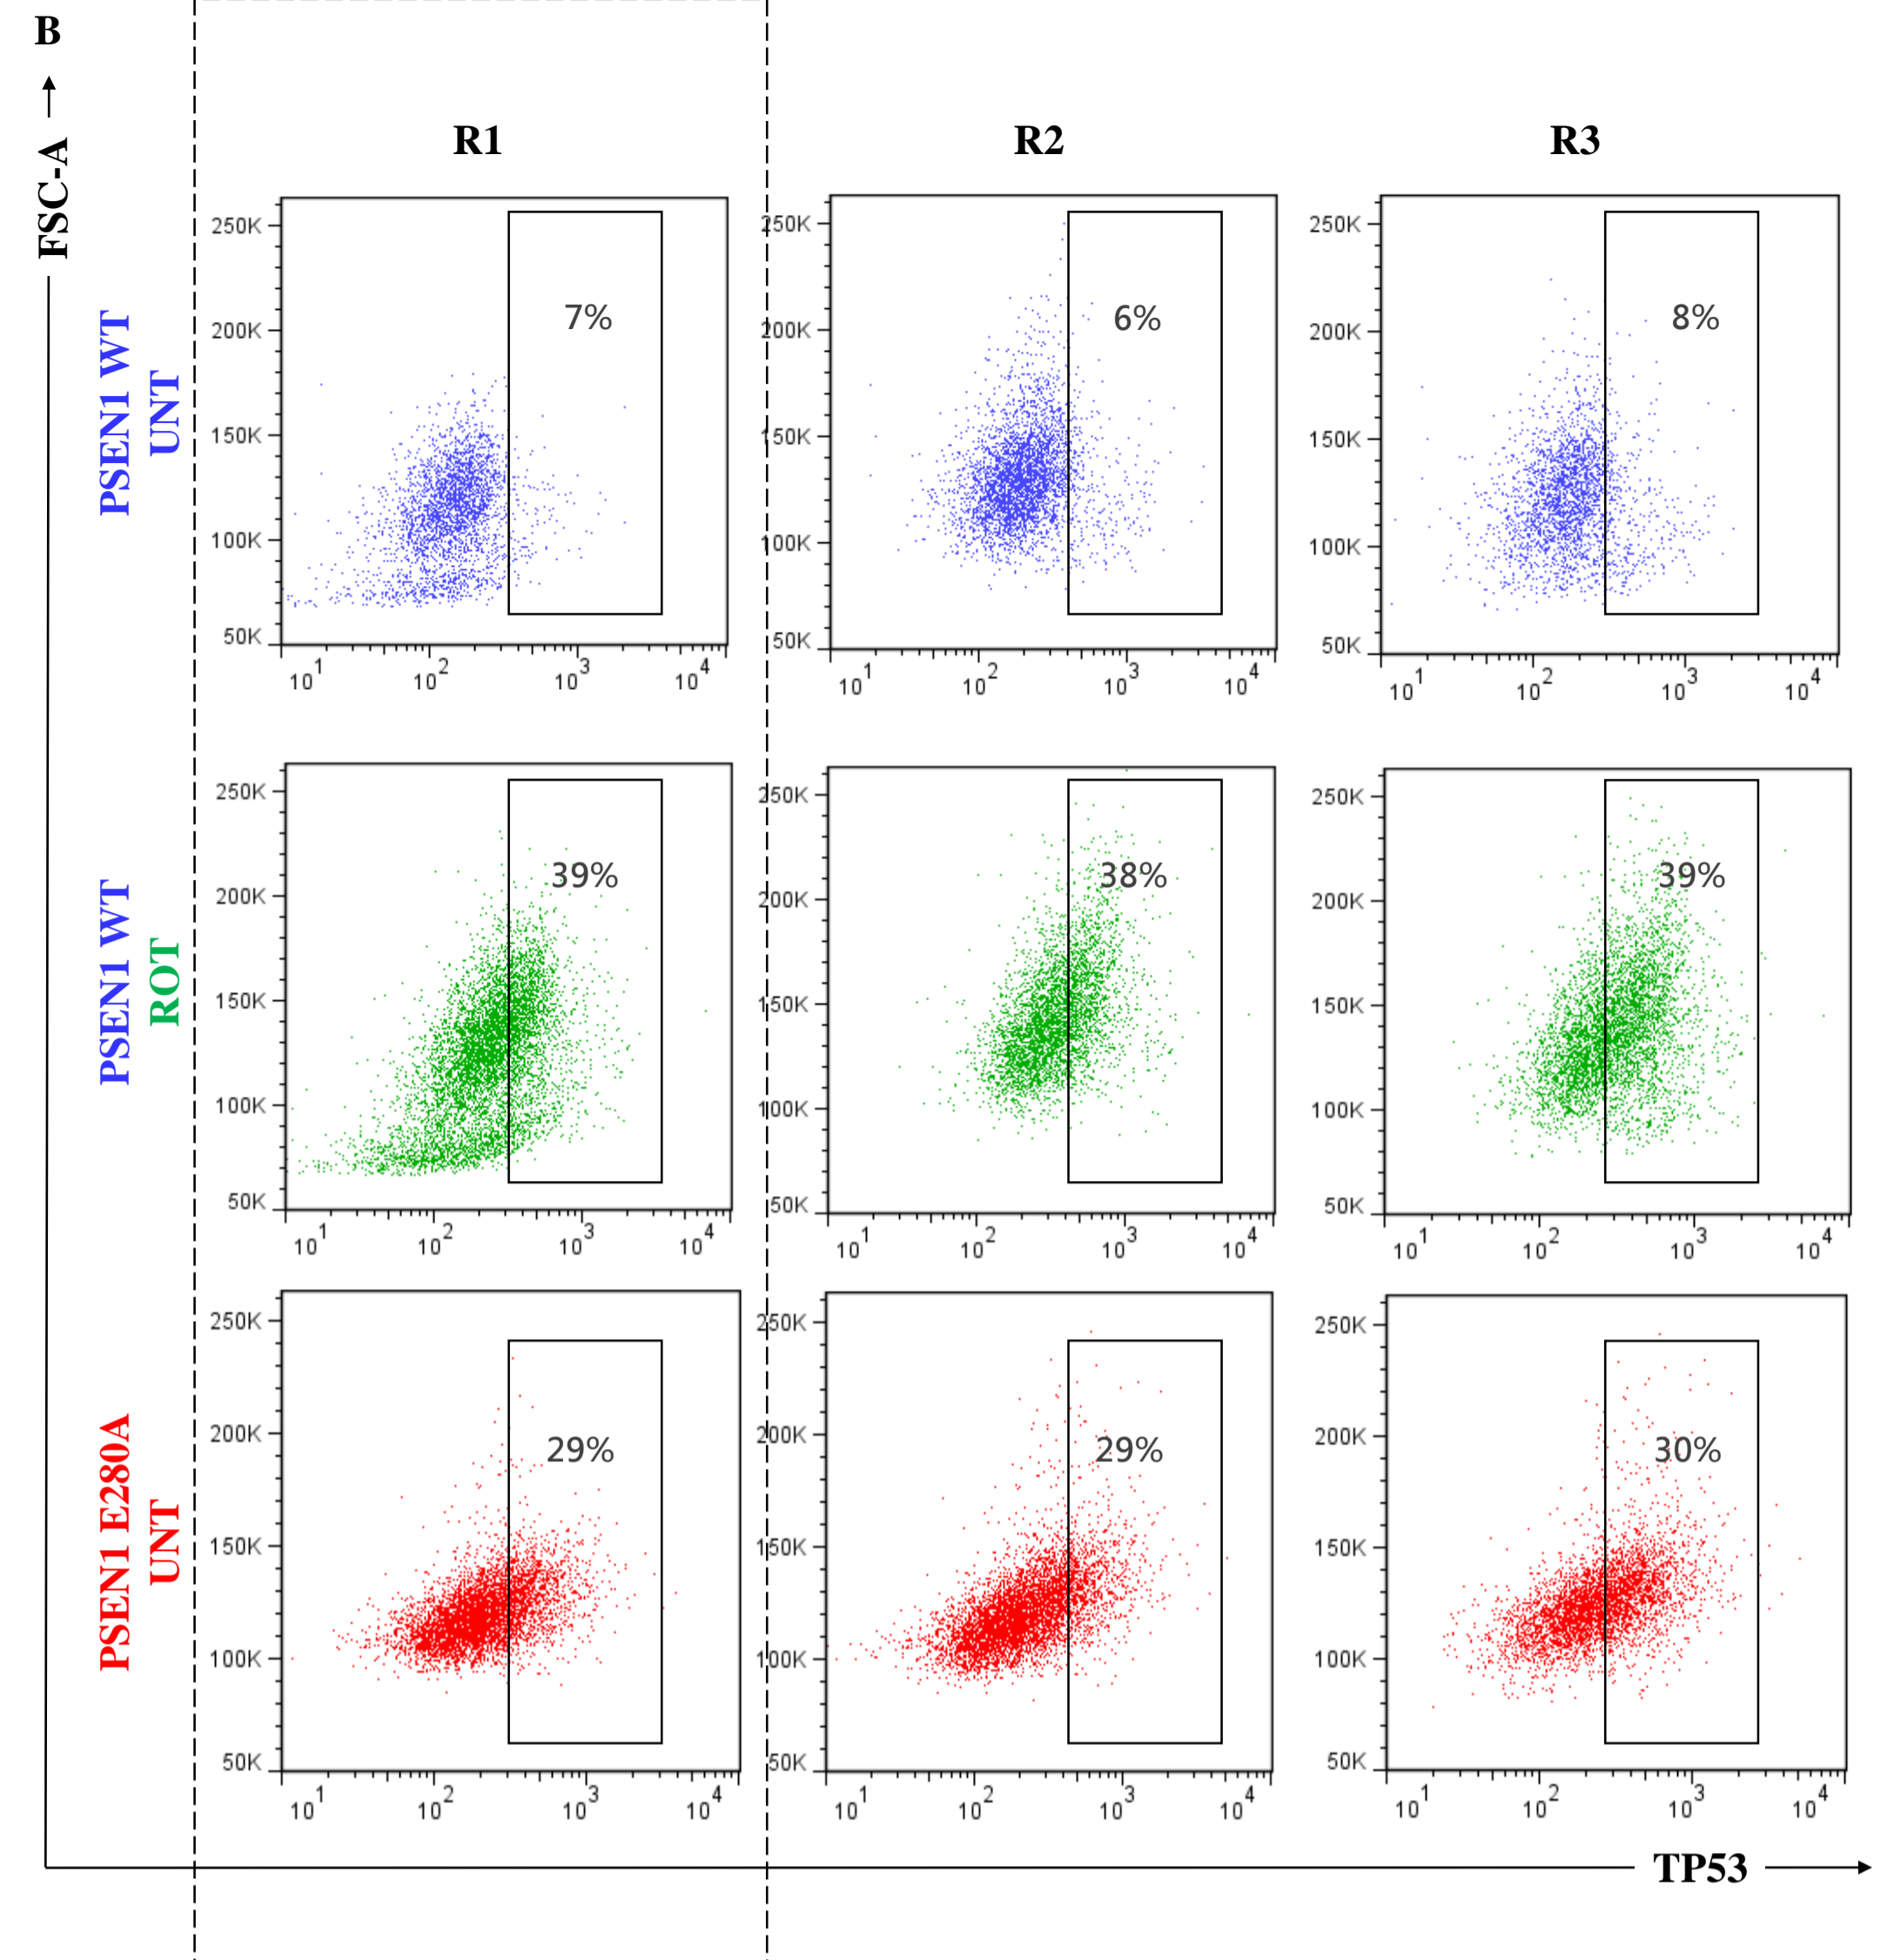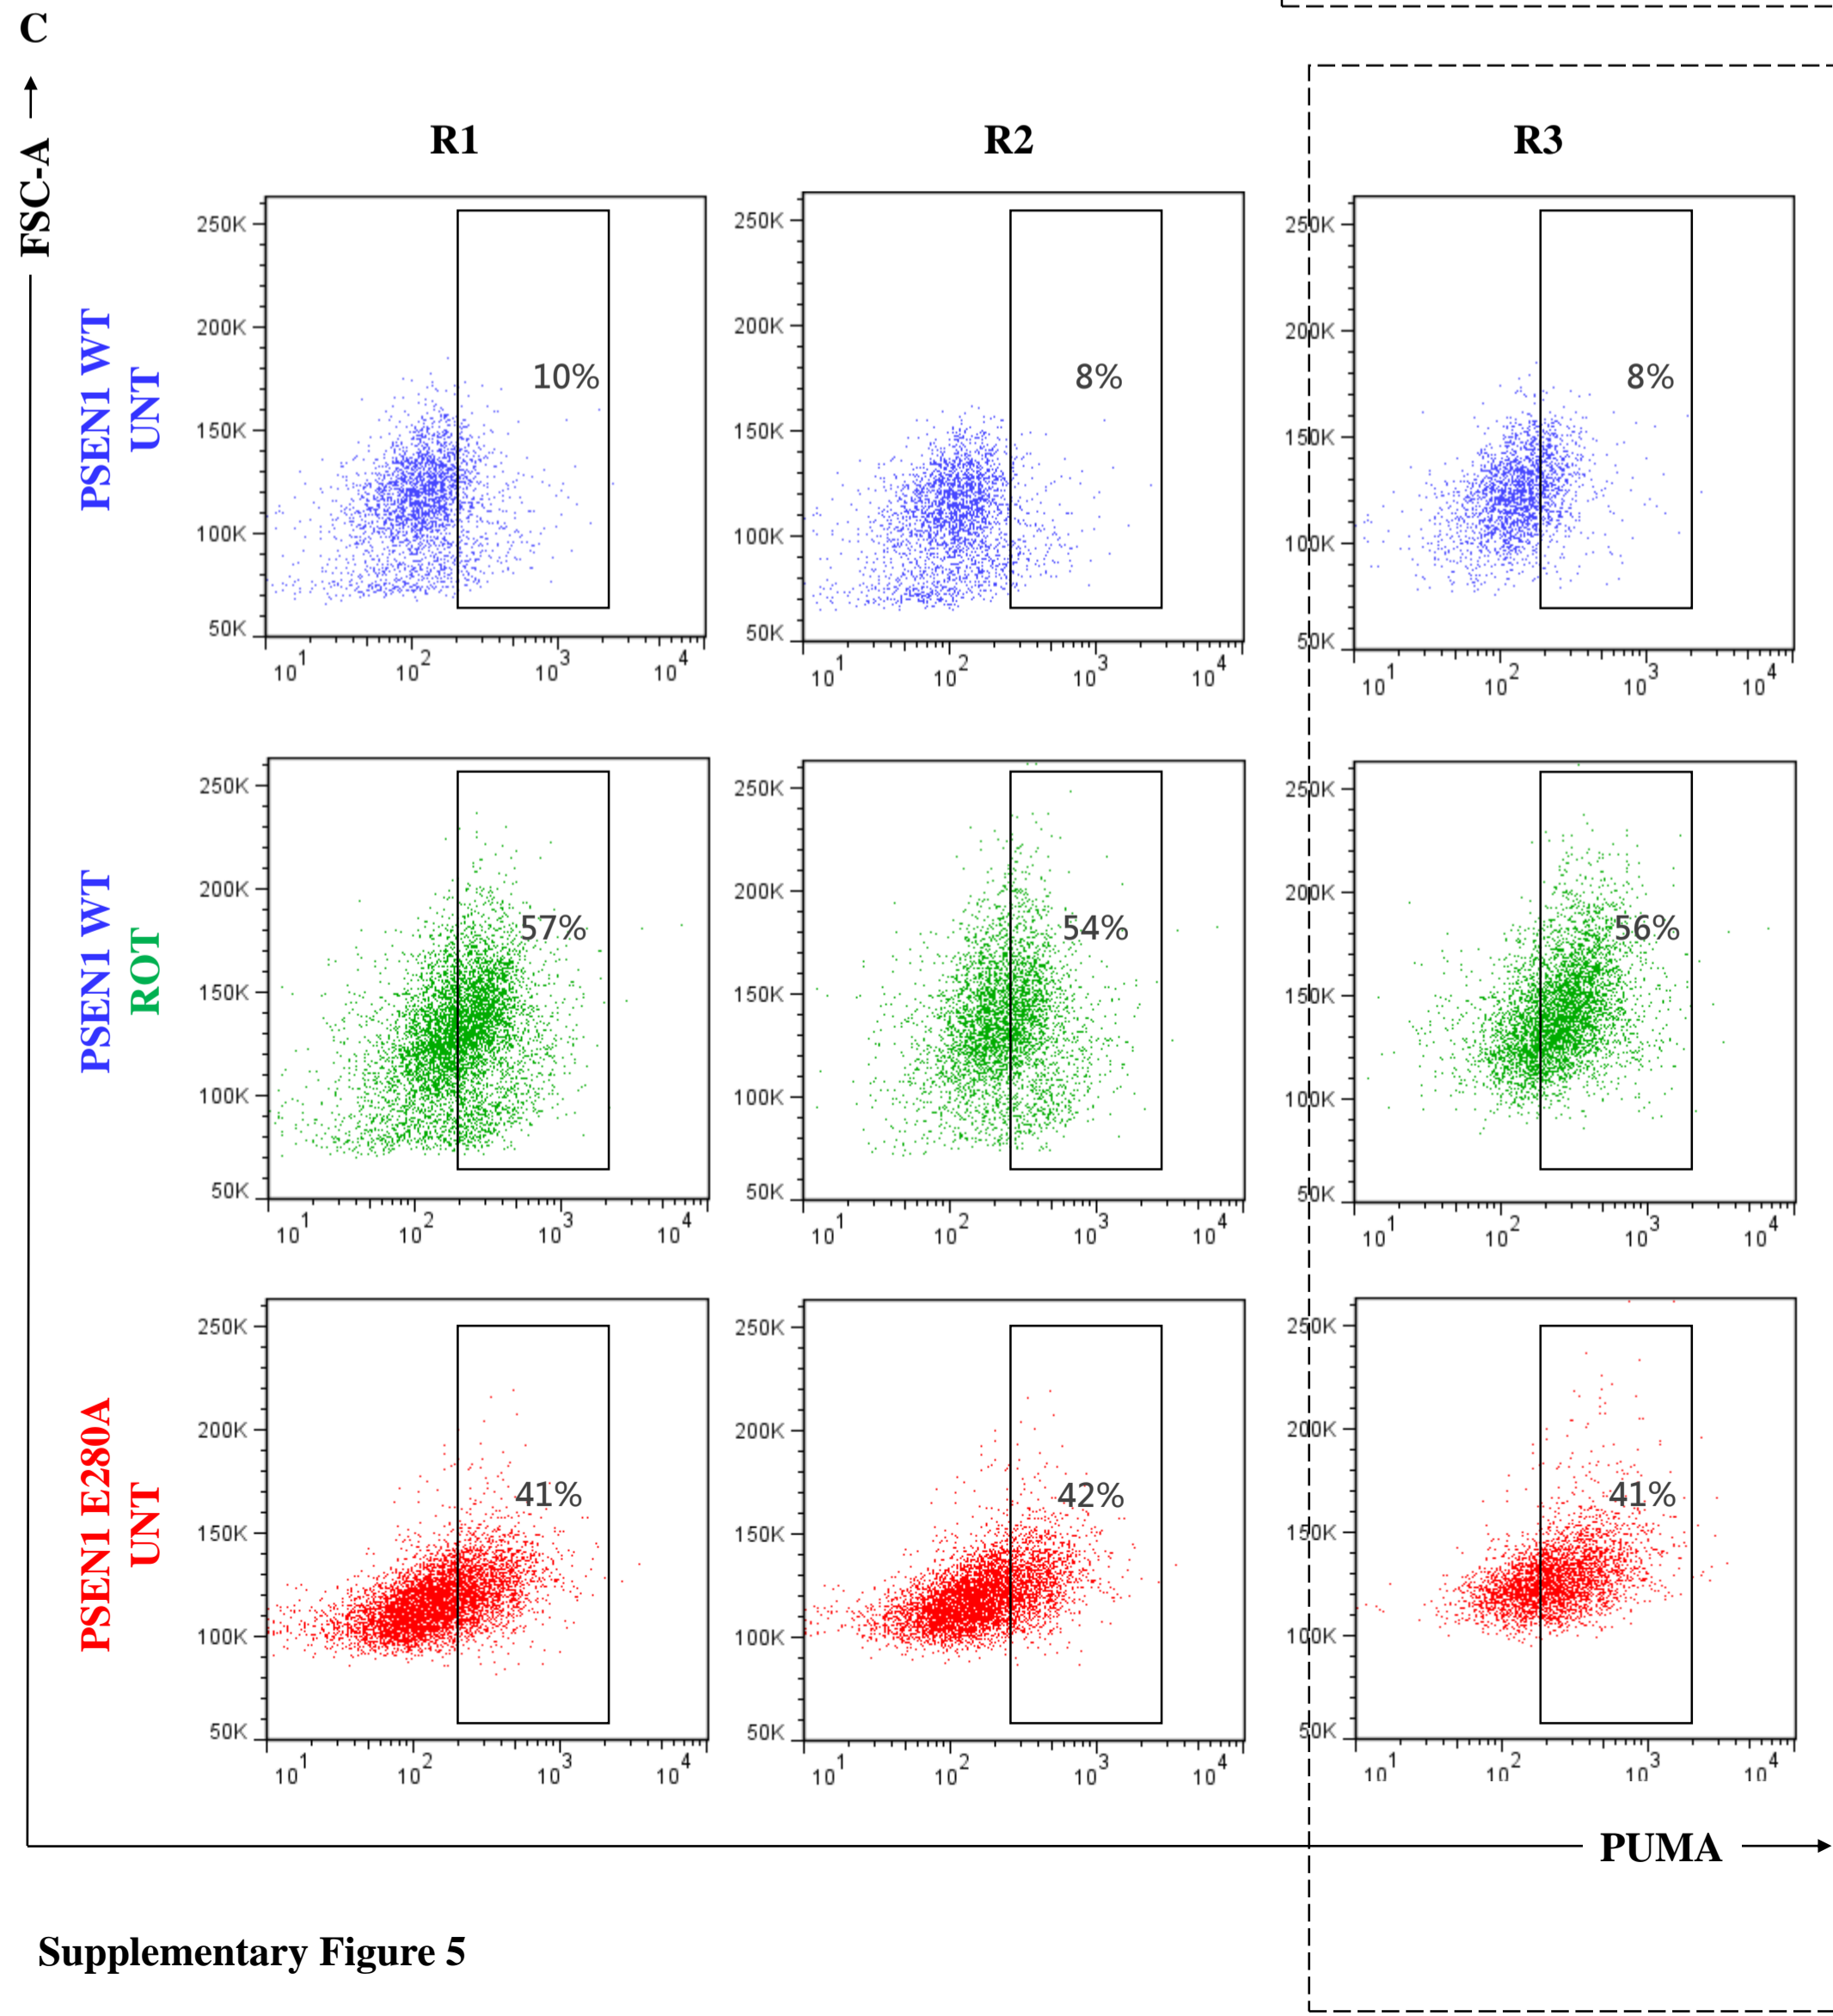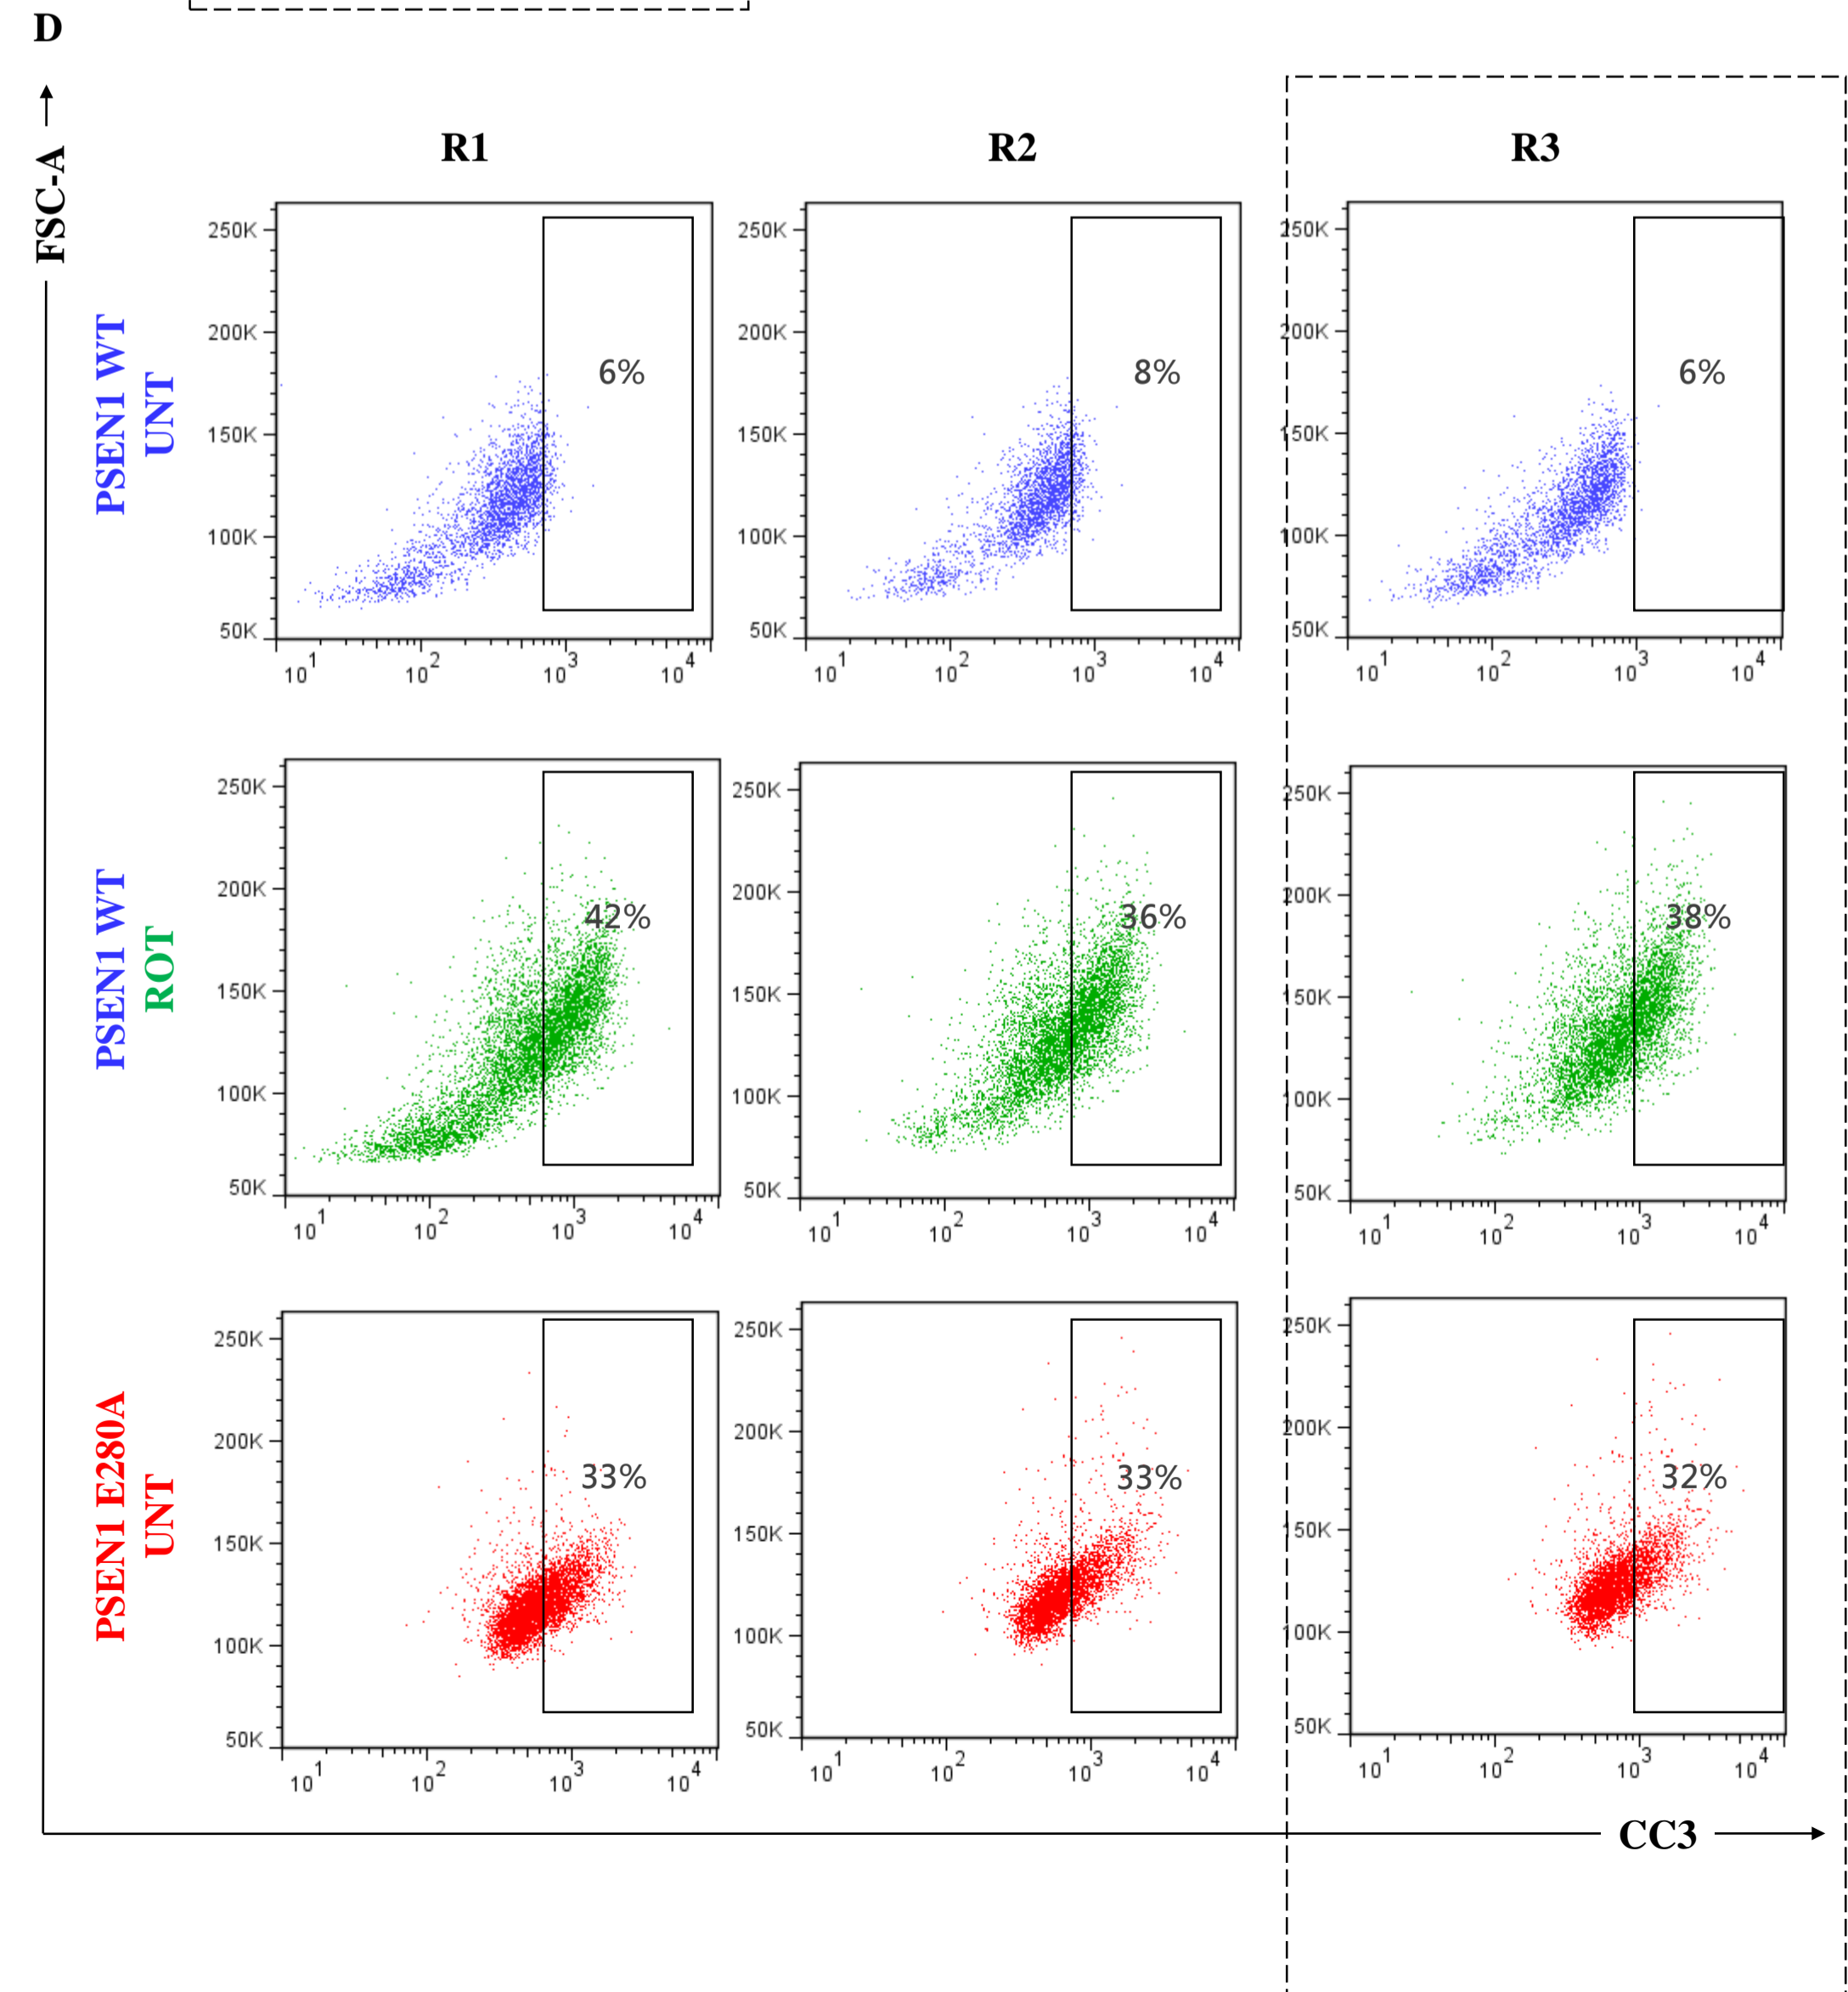

Supplementary Figure 5

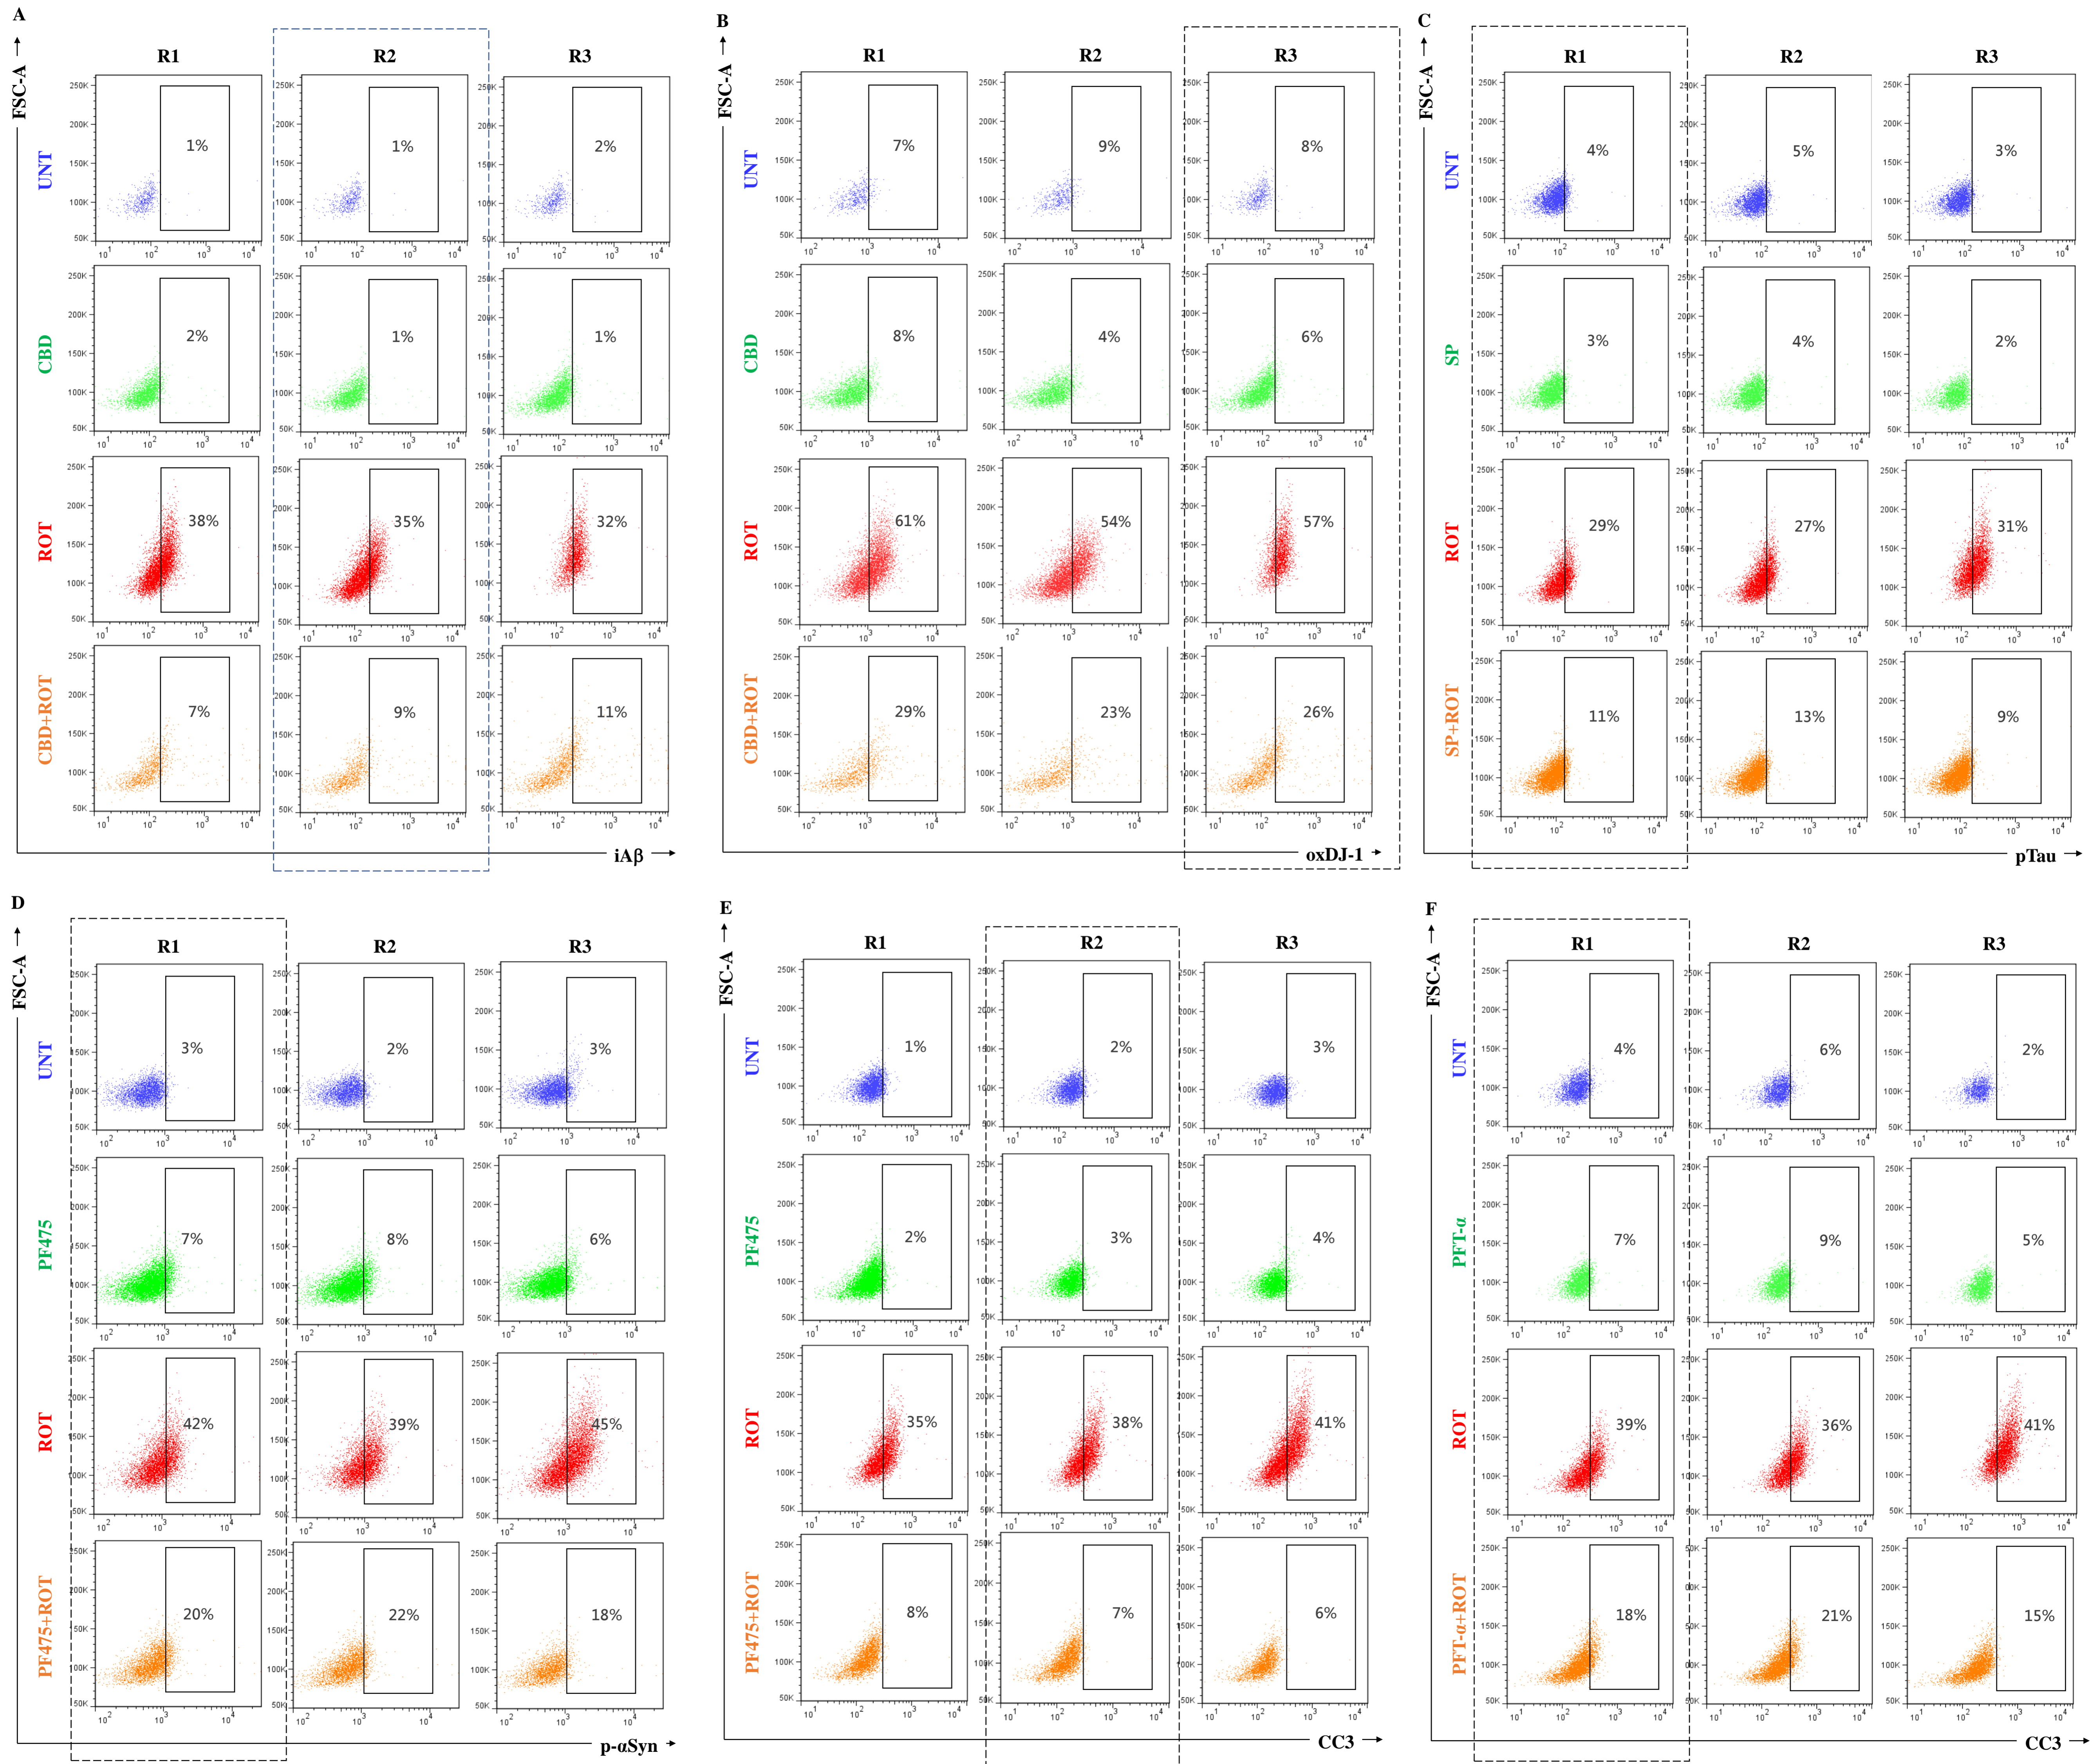

Supplementary figure 6
